1 **Relative performance of Oxford Nanopore MinION vs. Pacific Biosciences Sequel third-generation**  
2 **sequencing platforms in identification of agricultural and forest pathogens**

3  
4 Kaire Loit<sup>a#</sup>, Kalev Adamson<sup>b#</sup>, Mohammad Bahram<sup>c#</sup>, Rasmus Puusepp<sup>d#</sup>, Sten Anslan<sup>e</sup>, Riinu Kiiker<sup>a</sup>, Rein  
5 Drenkhan<sup>b</sup>, Leho Tedersoo<sup>d,f\*</sup>

6  
7 <sup>a</sup>Institute of Agricultural and Environmental Sciences, Estonian University of Life Sciences, Fr.R. Kreutzwaldi, 5,  
8 51006 Tartu, Estonia

9 <sup>b</sup>Institute of Forestry and Rural Engineering, Estonian University of Life Sciences, Fr.R. Kreutzwaldi, 5, 51006  
10 Tartu, Estonia

11 <sup>c</sup>Department of Ecology, Swedish University of Agricultural Sciences, Ulls väg 16, 75651 Uppsala, Sweden

12 <sup>d</sup>Institute of Ecology and Earth Sciences, University of Tartu, 14a Ravila, 50411 Tartu, Estonia

13 <sup>e</sup>Zoological Institute, Technische Universität Braunschweig, Mendelssohnstrasse 4, 38106 Braunschweig,  
14 Germany

15 <sup>f</sup>Natural History Museum, University of Tartu, 14a Ravila, 50411 Tartu, Estonia

16 #Equal contribution

17 \*Correspondence: Leho Tedersoo, email [leho.tedersoo@ut.ee](mailto:leho.tedersoo@ut.ee), tel. +372 5665986

18  
19 **Running head: Third-generation sequencing-based pathogen diagnostics**  
20  
21

22 **ABSTRACT** Culture-based molecular characterization methods have revolutionized detection of pathogens, yet  
23 these methods are either slow or imprecise. The second-generation sequencing tools have much improved  
24 precision and sensitivity of detection, but the analysis processes are costly and take several days. Of third-  
25 generation techniques, the portable Oxford Nanopore MinION device has received much attention because of its  
26 small size and possibility of rapid analysis at reasonable cost. Here, we compare the relative performance of two  
27 third-generation sequencing instruments, MinION and Pacific Biosciences Sequel in identification and  
28 diagnostics of pathogens from conifer needles and potato leaves and tubers. We demonstrate that Sequel is  
29 efficient in metabarcoding of complex samples, whereas MinION is not suited for this purpose due to the high  
30 error rate and multiple biases. However, we find that MinION can be utilized for rapid and accurate identification  
31 of dominant pathogenic organisms from plant tissues following both amplicon-based and metagenomics-based  
32 approaches. Using the PCR-free approach with shortened extraction and incubation times, we performed the  
33 entire MinION workflow from sample preparation through DNA extraction, sequencing, bioinformatics and  
34 interpretation in two and half hours. We advocate the use of MinION for rapid diagnostics of pathogens, but care  
35 needs to be taken to control or account for all potential technical biases.

36  
37 **IMPORTANCE** We develop new and rapid protocols for MinION-based third-generation diagnostics of plant  
38 pathogens that greatly improves the speed and precision of diagnostics. Due to high error rate and technical biases  
39 in MinION, PacBio Sequel platform is more useful for amplicon-based metabarcoding from complex biological  
40 samples.

41  
42 **KEYWORDS** PacBio Sequel, Oxford Nanopore MinION, molecular diagnostics, metabarcoding, metagenomics,  
43 plant pathogens, potato (*Solanum tuberosum*)

44

45

## 46 INTRODUCTION

47

48 Fungal pathogens and pests cause enormous losses in agriculture and forestry. Rapid and precise  
49 identification of pathogens enables efficient countermeasures and reduces the costs of biocides and losses to  
50 disease (Comtet et al., 2015). Direct morphology-based and culture-based diagnoses are often too imprecise or  
51 slow. Molecular methods such as specific primers, probes and sequence analysis are more accurate and can be  
52 rapidly applied to infected tissues (Kashyap et al., 2017). Although specific probes or primers combined with  
53 PCR/qPCR can be rapidly applied to tissue samples and environmental material, these methods lack the capacity  
54 to detect species or strains other than those intended, or worse, yield false positive signals (Grosdidier et al.,  
55 2017). Although high-quality sequencing reads are highly precise, Sanger sequencing of PCR products takes 1-3  
56 days, depending on access to sequencing laboratory, and it may fail when DNA of several species or polymorphic  
57 alleles are amplified (Hyde et al., 2013).

58 Second- and third-generation high-throughput sequencing (HTS) platforms read hundreds of thousands to  
59 billions of DNA molecules, recovering the targeted taxa when present at very low proportions (Bik et al., 2012;  
60 Nilsson et al., 2019). However, library preparation and running of HTS instruments typically takes several days  
61 and there are queues of weeks to months in commercial service providers. Furthermore, a single run costs >500  
62 EUR, which renders it unfeasible for rapid identification of pathogens (Tedesoo et al., 2019). In spite of millions  
63 of output reads, the second-generation SOLiD, Roche 454, Illumina and Ion Torrent platforms suffer from short  
64 sequence length that is suboptimal for accurate identification of microorganisms because of low taxonomic  
65 resolution of short marker gene fragments (100-500 bp; Mosher et al., 2014; Schloss et al., 2016). Third-  
66 generation sequencing platforms Pacific Biosciences (PacBio; RSII and Sequel instruments; [www.pacb.com](http://www.pacb.com)) and  
67 Oxford Nanopore (MinION, GridION and PromethION instruments; <https://nanoporetech.com/>) enable average  
68 sequence length of >20,000 bases, but this comes at 5%-20% error rate (Weirather et al., 2017; Jain et al., 2018;  
69 Tedesoo et al., 2018, 2019). In PacBio instruments, the built-in circular consensus sequencing generates multiple  
70 copies of the same fragment with highly accurate consensus (Eid et al., 2009; Rhoads and Au, 2015). Therefore,

71 long consensus molecules have been readily used in de novo assembly of complex genomes (Giordano et al.,  
72 2017) and DNA barcoding (Hebert et al., 2018). PacBio-based metabarcoding analyses provide greater resolution  
73 compared with second-generation HTS tools in bacteria (Singer et al., 2016; Wagner et al., 2016; Schloss et al.,  
74 2016) and fungi (Tedersoo et al., 2018), including plant pathogens (Walder et al., 2017).

75 Compared with other HTS platforms represented by large and quite expensive machines, the Oxford  
76 Nanopore MinION device is of the size of a cell phone that costs ca. 900 EUR, making it affordable to  
77 governmental institutions, research laboratories and small companies (Mikheyev and Tin, 2014; Lu et al., 2016).  
78 Its small size and low power consumption enable carrying the device, basic analysis toolkit, batteries and  
79 computer virtually anywhere, as demonstrated by in situ runs in a tropical rain forest (Quick et al., 2016),  
80 Antarctic desert (Johnson et al., 2017) and space station (Castro-Wallace et al., 2017). MinION has a capacity to  
81 produce >1 million sequences per day, with maximum read length approaching 1,000,000 bases (Jain et al.,  
82 2018). Because of low sequence quality, MinION has been mostly used in whole-genome sequencing analyses to  
83 resolve long repeats and bridge contigs or re-sequencing genomes (Quick et al., 2014; Jain et al., 2018). The error  
84 rate of reads can be reduced from 10-15% to 1-5% by sequencing of the complementary strand (1D<sup>2</sup> method) or  
85 preparing tandem repeat molecules (concatemers), but these solutions are laborious, of low sequencing depth, and  
86 hence not broadly used (Cornelis et al., 2019; Li et al., 2016; Calus et al., 2018; Volden et al., 2018). MinION has  
87 been used to generate long DNA barcodes from consensus sequences (Pomerantz et al., 2018) and to detect  
88 specific human pathogens that are easily distinguishable and well represented in reference sequence databases  
89 (Kilianski et al., 2015; Ashikawa et al., 2018). Although multiple reports claim achieving species-level taxonomic  
90 resolution (Benitez-Paez et al., 2016; Benitez-Paez and Sans, 2017; Kerkhof et al., 2017), the high error rate  
91 renders nanopore sequencing poorly suited for exploratory metabarcoding analyses of real communities. The  
92 metagenomic approach has gained popularity for identification of human pathogens to skip the PCR step and  
93 avoid associated biases (Quick et al., 2016; Schmidt et al., 2017; Votintseva et al., 2017). Recently, Bronzato  
94 Badial et al. (2018) demonstrated that plant pathogenic bacteria and viruses can be detected using MinION,  
95 whereas Hu et al. (2019) extended this to fungal pathogens of cereals in a preprint.

96 The main objective of this study is to develop protocols for metabarcoding-based and metagenomics-  
97 based detection of fungal plant pathogens using third-generation sequencing tools. In particular, we aim to 1) test  
98 the relative biases and shortfalls of MinION-based and Sequel-based identification of pathogens and evaluate the  
99 perspectives of these methods in pathology and ecology; and 2) optimize MinION protocols for ultra-rapid  
100 pathogen identification. We performed several HTS runs using MinION and Sequel instruments and validated the  
101 results by comparing these to Sanger sequencing, species-specific priming PCR and morphology-based  
102 assessment where relevant. We tested the third-generation HTS methods in two plant pathosystems, conifer  
103 needles and potato (*Solanum tuberosum*) leaves and tubers.

## 105 RESULTS

106  
107 **Technical features of MinION and Sequel runs** Compared with Sequel, MinION had several-fold greater initial  
108 sequencing depth, which depended on the loaded DNA content and sequencing time (Table 1). The high sequence  
109 number of MinION was reduced several-fold during the quality filtering and demultiplexing, reaching the level  
110 comparable with Sequel. Among samples, variation in sequencing depth was slightly greater in MinION (CV,  
111 67.8%-93.4%) compared with Sequel (62.8%-64.5%). Pearson correlation coefficient of sequencing depth of  
112 samples in MinION and Sequel ranged from 0.585 in the potato data sets to 0.853 in the needle data sets,  
113 suggesting a substantial library preparation or sequencing bias in the potato amplicon pool but not in the needle  
114 sample pool.

115 For the MinION data sets, chimeras were detected using the reference-based method but not *de novo*  
116 method. Putatively chimeric molecules contributed 1.5%-1.8% to the mapped reads, but nearly half of these were  
117 false positives based on manual checking (cf. Hyde et al., 2013). Interestingly, nearly half of the true chimeras  
118 included parents from different samples, indicating some chimera formation during the library preparation or  
119 sequencing process in addition to PCR. Further manual inspection of demultiplexed sequences revealed that 5-8%  
120 of these are self-chimeric, i.e. 1.5-fold to 6-fold repeats of itself. In the Sequel data sets, chimeras accounted for  
121 1.9-3.7% of reads (including 1.5-2.4% detected *de novo*), with no self-chimeric reads remaining.

122 Index switching rate was much greater in MinION (3.6% of reads in ONT2) than Sequel (0.14%,  
123 ONT2S). Based on positive control samples, we estimated that the error rate in Sequel is around 0.1%  
124 (corresponding to polymerase errors), but around 11-16% (depending on species) for the 1D method and 11% for  
125 the 1D<sup>2</sup> method of MinION. Based on alignments of hundreds of positive control and other dominant sequence  
126 types, we noticed that errors were non-randomly distributed, i.e. occasionally there were no errors across 4-5  
127 bases of the alignment, whereas homopolymeric sites were infested with large amounts of combined indels and  
128 substitutions (Fig. 1). Because of these non-random errors, we were able to construct consensus at 98.5-99.5%  
129 accuracy (only deletions remaining) with 100 or more reads.

130 All MinION runs on R9.4 flowcells from one batch (flowcells #1 and #2) were contaminated by  
131 *Coniothyrium* sp. (INSD accession JX320132), but this taxon was not observed in negative control samples,  
132 another batches (flowcell #3 and runs not reported here) or runs using R9.5 flow cells, or PacBio Sequel. At least  
133 partly because of this, the dominant fungal taxa recovered in samples differed in the MinION and Sequel runs  
134 (Tables 2, 3).

135  
136 **Metabarcoding analyses of MinION and Sequel** The MinION ONT1 run included diseased and asymptomatic  
137 needle samples and pure cultures of pathogens. Of 792,748 passed reads, 189,150 (23.9%) were demultiplexed  
138 and 183,343 (23.1%) were mapped to reference sequence databases based on the quality criteria (e-value <e-40  
139 and sequence similarity >75%). The ITS1catta forward primer amplified mostly Fungi (99.9% of identified  
140 reads). Best hits were distributed across 2483 fungal OTUs, with the well-known conifer pathogens yielding hits  
141 to 1-2 different accessions. On average, needle samples hosted 203.4±130.5 (mean±SD) OTUs. Best hits to the  
142 contaminant *Coniothyrium* sp. contributed 26.3% of all sequences on average. Of expected taxa, *Hormonema*  
143 *macrosporum* (6.2%), *Lophodermium conigenum* (5.0%) and *Didymella lentis* (4.3%) yielded the greatest number  
144 of hits (Fig. 2a) and all these taxa occurred in 94%-100% of needle samples.

145 The ONT1S Sequel run revealed 121,965 demultiplexed reads that were clustered into 535 OTUs, all  
146 above the quality threshold. Needle samples harboured on average 51.5±41.6 OTUs, nearly four times less than in  
147 the MinION data set. Altogether 99.9% reads were ascribed to Fungi, with *Lophodermium pinastri* (17.8%),

148 *Dothiostroma pini* (8.9%) and *Sydowia* sp. (7.0%) dominating across the entire data set (Fig. 2b). These dominant  
149 taxa occurred in 43-65% of samples.

150 The ONT2 MinION run recovered 255,137 passed sequences, of which 16.2% were demultiplexed and  
151 14.4% mapped to reference database reads. Based on the distribution of pine-specific pathogens in potato  
152 samples, we estimated that 13.4% of the reads were carried over from the previous ONT1 run, in which we used  
153 the same primer and tag combinations. In the ONT2 run, these pine-specific species had a proportionally similar  
154 relative abundance when comparing across the same index combinations. The ITS1catta forward primer amplified  
155 mostly Fungi (74.2% of identified reads; Fig. 2c). Reads corresponding to potato (9 OTUs) and *Coniothyrium* sp.  
156 accounted for 26.1% and 13.2% of sequences. Of putative potato pathogens and endophytes, the ITS1catta  
157 forward primer revealed *Boeremia lycopersici* (7.5% of reads), *Mycosphaerella tassiana* (4.6%) and *Peyronellaea*  
158 sp. (4.4%) as dominants. The average richness was  $81.7 \pm 43.3$  OTUs per sample. The oomycete ITS1Oo primer  
159 comprised only 1.6% of all reads that were dominated by Oomycota (47.7%), other Stramenopila (19.2%), Fungi  
160 (23.6%) and Viridiplantae (9.5%). In each sample, 0-3 oomycete taxa were found and all of these occurred only  
161 once or twice (Table 4). The majority of samples produced no amplicon with the ITS1Oo primer and these  
162 samples contained no Oomycetes based on the HTS analysis.

163 The ONT2S Sequel run revealed 75,573 demultiplexed reads that were all matched to reference sequences  
164 and separated into 308 OTUs. On average,  $39.6 \pm 20.3$  OTUs were recovered per sample. In the ITS1catta  
165 amplicons, Fungi, Viridiplantae, Alveolata and Rhizaria contributed to 51.0%, 48.4%, 0.5% and 0.1% of reads,  
166 respectively. All plant reads were distributed across 25 OTUs that were all assigned to potato. Six of the OTUs  
167 probably represent naturally high variation among ITS sequences of potato (based on INSD entries), whereas  
168 others represent pseudogenes or non-functional copies. These were rare to common (up to 3% of all variants) and  
169 sometimes exceeded the abundance of regular variants in individual samples. Of Fungi, the largest number of  
170 reads belonged to *Boeremia* sp. (8.0%), Hysteriaceae sp. (7.4%) and *Cladosporium herbarum* (3.3%; Fig 2.d).  
171 The ITS1Oo primer accounted for 1.4% of sequences that were mostly assigned to Oomycota (62.9%), other  
172 Stramenopila (33.9%), Viridiplantae (3.0%) and Alveolata (0.2%). This data subset yielded 0-2 OTUs of  
173 Oomycota or other Stramenopila per sample (Table 4).

174 Sequel and MinION recover the same dominant fungal species (excluding the contaminant) in 60% and  
175 63% of cases in the needle and potato samples, respectively. These values increased to 78% and 83%,  
176 respectively, when considering overlap in the three best matching taxa. Inspection of the discordant samples  
177 revealed that contamination from the previous run blurred the results of the potato samples and MinION produced  
178 one to two orders of magnitude less high-quality reads matching to multiple species such as *Lophodermium*  
179 *pinastri*, *Vishniacozyma victoriae*, *Cystobasidium* sp. and *Dendryphion* sp. as compared with Sequel. These  
180 species had a relatively high number of homopolymers (>3-mers) per ITS sequence length compared with  
181 dominant but equally shared taxa ( $F_{1,8}=5.79$ ;  $P=0.088$ ). The Stramenopile data subsets were in a stronger  
182 agreement in Sequel and MinION apart from the lack of *Peronospora variabilis* amongst MinION reads and  
183 hence its unsuccessful diagnosis from three potato leaf samples.

184 The ONT2a and ONT2b MinION runs were designed to test whether long indexes relieve the massive  
185 index switching. The ONT2a run revealed a tag switch rate of 3.8%, whereas the ONT2b run failed for unknown  
186 reasons. The potato (14 OTUs) contributed to 18.7% of reads, whereas the contaminant *Coniothyrium* species  
187 accounted for 16.7% of reads, prevailing in half of the eight potato samples. Of other fungal species, Tremellales  
188 sp. (11.5%), *Filobasidium stepposum* (7.0%) and *Mycosphaerella tassiana* (5.6%) dominated. These species were  
189 less common in these eight samples in the ONT2 run, (3.8%, 2.7% and 4.6%, respectively). Nonetheless, the same  
190 best fungal hits prevailed in 75% of the samples in the ONT2a and ONT2 runs.

191 The ONT2f run was intended to test suitability of the 1D<sup>2</sup> method. This run recovered only 3241 1D<sup>2</sup>  
192 reads. Only 29.7% of reads fell within 10% of the expected read length of ca. 3200 bases and the median read  
193 length was 954 bases. As the positive control revealed no reads, the tag switch rate could not be calculated. Of all  
194 sequences, potato (17 OTUs) accounted for 54.19% of sequences. Of Fungi (39.8%), *Taphrina populina* (6.0%),  
195 *Parastagonospora* sp. (3.8%) and *Glarea lozoyensis* (3.0%) dominated. These species were somewhat less  
196 common in the ONT2 library (0.1%, <0.1% and <0.1%, respectively). The same species were among the  
197 dominants in only 25% of samples as based on the ONT2 and ONT2f runs. It remains unknown whether these  
198 biases are related to sequencing of long amplicons or the 1D<sup>2</sup> method.



**Metabarcoding vs. metagenomics approach** The ONT2g run representing a metagenome of a single diseased potato tuber sample (KL036) yielded 66,133 and 400,355 ‘passed’ and ‘failed’ sequences, respectively. The 5000 randomly selected sequences from each bin included 1325 ‘passed’ reads and 1 ‘failed’ read that met our quality standards. Altogether 37.4% of the ‘passed’ reads represented ITS sequences carried over from a previous run. After removal of these reads, the metagenomics data set was dominated by plant and bacterial reads. Best hits to *Lycopersicon esculentum* (tomato, 29.0% of reads) and seven species of *Solanum* (altogether 22.6%) collectively represented the potato. Of Bacteria, hits to *Agrobacterium tumefaciens* (10.5%), *Variovorax paradoxus* (9.7%) and *Sphingopyxis alaskensis* (3.8%) dominated. Fungal hits were less common; these to *Rhizoctonia solani* (1.6%) and *Boeremia exigua* (1.0%) prevailed. Of these taxa, *A. tumefaciens* and *V. paradoxus* are probably present given their best matches of 93% and 92% and average matches of 87% and 85% similarity, respectively, to database sequences. Conversely, *S. alaskensis*, *B. exigua* and *R. solani* are probably absent, because of their best hits reached 84%, 88% and 86%, and all hits averaged 79%, 80% and 80% similarity to reference sequences, respectively.

The ONT2h run represented a long amplicon of the same sample, recovering 342,923 ‘passed’ reads and 423,688 ‘failed’ reads. Of the randomly selected 5000 sequences, 1876 ‘passed’ reads and 1068 ‘failed’ reads met the quality threshold. The positive control used in the next to previous run accounted for 0.2% of all sequences, mostly in the ‘failed’ bin. Out of 18 most commonly hit species, the proportion of 11 differed significantly ( $P < 0.001$ ) among the ‘passed’ and ‘failed’ bins, indicating that reads of certain taxa are much more likely to be recorded as failed. Of the ‘passed’ sequences, matches to *Lignincola laevis* (Pleosporales, 64.3%), *Verticillium biguttatum* (Hypocreales, 5.0%) and *Thanatephorus cucumeris* (Cantharellales, 3.0%) dominated. In the fail bin, *Verticillium biguttatum* (19.9%), *L. laevis* (15.7%) and *Plectosphaerella cucumerina* (Pleosporales, 7.8%) prevailed, followed by *T. cucumeris* (6.0%). Of the dominant taxa recovered, probably only *V. biguttatum*, *T. cucumeris* and *P. cucumerina* are identified to the species level given their high maximum (>90%) and mean (>85%) blast similarity. Taxa relatively more abundant in the ‘failed’ bin tended to possess more and longer homopolymers than those in the ‘passed’ bin.

225 In the ONT2g metabarcoding and ONT2h metagenomics data sets derived from the same sample, none of  
226 the fungal taxa were shared. Although *R. solani* is regarded as a synonym of *T. cucumeris* (or vice versa), the  
227 isolate named as *R. solani* with available genome is probably heterospecific with the *T. cucumeris* isolate that was  
228 best matched in the amplicon data set. The *R. solani-T. cucumeris* complex has high variability in the rRNA  
229 marker genes and its taxonomy is far from settled (Veldre et al., 2013). Other fungal species common in the  
230 metabarcoding data set were absent from the metagenomics data set probably because their genome is  
231 unavailable. Several of these ascomycetes may have best matched to *Boeremia exigua* that has a genome  
232 sequence available. *B. exigua* was represented by a single read, potentially resulting from carry-over from the first  
233 run. This situation highlights limitations of the metagenomics approach when insufficient reference is available.

234  
235 **Express identification** The ONT2i run intended to minimize time from sampling to diagnosis based on a single  
236 infected potato tuber sample and metagenomics approach. Using forceps, we mounted ca 20 mg of infected tissue  
237 into 2 ml Eppendorf tube containing 100  $\mu$ l lysis buffer from the Phire Plant Direct PCR Kit. Based on previous  
238 optimisation for speed, we reduced the step of lysis to 15 min that included tissue disruption using bead beating (5  
239 min at 30 Hz), brief centrifugation at 5000 g, incubation at 30 °C for 5 min and final centrifugation at 11,000 g for  
240 1 min (the recommended protocol includes lysis without tissue disruption at room temperature >2 h). The DNA  
241 was concentrated from lysate using the FavorPrep kit following the manufacturer's instructions except  
242 centrifugation steps for 1 min and final elution using 50  $\mu$ l water (altogether 25 min). Qubit measurement  
243 revealed DNA concentration of 4.1 ng  $\mu$ l<sup>-1</sup> (5 min). Library preparation followed the G004 protocol (50 min). The  
244 MinION run was interrupted at 1200 reads (50 min) and the 436 'passed' fastq reads were analysed in PipeCraft  
245 that generated a list of 10 best hitting taxa in <5 min and revealed *T. cucumeris* as a prevalent pathogen. The  
246 parallel WIMP analysis failed because of server maintenance at the time of analysis. The entire procedure took 2  
247 hours and 30 minutes. Notably, the sequencing process was suboptimal because of the low amount of DNA used,  
248 which resulted in <20% pores effectively used at termination of this run. Some extra time was required to finalize  
249 the results for a written report. The metagenomics reads were dominated by hits to tomato (72.7%), followed by  
250 various bacteria (6.4%), and *T. cucumeris* (5.5%), and *P. cucumerina* (3.0%) that are both known pathogens of

251 potato. Subsequent Sanger sequencing from tuber samples with black scurf symptoms of the same diseased potato  
252 revealed *T. cucumeris* (all four subsamples) and *Pyronemataceae* sp. (50% of subsamples).

## 254 **DISCUSSION**

255 **Use of third-generation sequencing instruments for DNA metabarcoding** Using the same amplicon pools and  
256 additional morphology-based, Sanger sequencing-based diagnosis or species-specific priming PCR, we had a  
257 unique opportunity to evaluate the relative performance and biases of MinION compared with Sequel. Nanopore  
258 sequencing revealed somewhat greater among-sample variability in sequencing depth, which may be related to  
259 library preparation, sequencing, data processing or a combination of these.

260 MinION suffered from a unique issue with sequence carry-over from a previous run as also noted by  
261 Cusco et al. (2018) for 6% of reads. In our study, a washing procedure with the supplier's Wash Kite still yielded  
262 13-37% sequence carry-over from a previous run. Furthermore, we could recover traces of a positive control used  
263 in the next to previous run at 0.2% relative abundance. It is theoretically possible that such carry-over  
264 contamination occurs on re-usable flowcells or chips of other HTS platforms as we have commonly seen it in the  
265 end of untrimmed Sanger reads.

266 In our analyses, MinION had an issue of contamination with a fungus matching *Coniothyrium* sp. that was  
267 not observed in Sequel run and in none of our previous data sets. INSD records indicate that this taxon is common  
268 in temperate USA. This contamination occurred in two R9.4 flowcells (#1 and #2) supplied with the MinION  
269 instrument, but not in another R9.4 batch (flowcell #3 and others not reported here) or R9.5 batch. The flowcells  
270 #1 and #2 were used over 6 months, considering several independent laboratory contamination events unlikely.  
271 Therefore, we suspect that this contamination may be related to the supplier.

272 Chimeric reads were common in both Sequel and MinION data. UCHIME effectively detected chimeric  
273 molecules from the Sequel data, but it performed poorly on MinION data. The error-infested reads were probably  
274 too different from each other to be recognized as chimeric. MinION data also included a substantial proportion of  
275 chimeric molecules with parents from different samples, representing a unique hybrid issue of index switching  
276 and chimera formation. A large proportion of long MinION reads represented self-chimeras that were not

277 recognized by the chimera filtering software. This issue was common on PacBio RSII instrument (Tedersoo et al.,  
278 2018), but it was not observed in the current Sequel runs. Since MinION reads are typically mapped to reference,  
279 we estimate that the abundant chimeric molecules create virtually no bias, except those with switched tags.

280 Index switches during library preparation or sequencing make a strong and perhaps predominant  
281 contribution to sample ‘contamination’ (Schnell et al., 2015). The observed index switching rate of 3.6-3.8% in  
282 MinION compares poorly with that of Sequel (<0.2% in; this study) and various Illumina instruments (0.1-10%;  
283 Costello et al. 2018). The double indexes performed equally poorly, suggesting that index switches are  
284 attributable to processes in library preparation or sequencing rather than sequencing errors. At least partly, high  
285 rates of index switching spilled the dominant taxa in the deeply sequenced MinION data sets across nearly all  
286 samples and resulted in 2-fold to 4-fold greater richness per sample. Certainly, the high error rate and inaccurate  
287 mapping-based method of OTU construction contribute to this difference. The MinION-derived error-infested  
288 metagenomics and amplicon sequences may be easily mapped to various closely related species, thus elevating  
289 richness artificially. Conversely, clustering at 98% sequence similarity may be too conservative, because many  
290 pathogenic taxa differ from each other by only a few bases in the ITS region (e.g. needle pathogens *Dothistroma*  
291 *pini* and *D. septosporum*, see Barnes et al., 2016), and therefore several species with distinct ecology and  
292 pathology may be lumped into a single taxon (Kõljalg et al., 2013). In spite of substantial disparity in the taxon-  
293 rich MinION and Sequel fungal data subsets, these two instruments revealed high-level overlap in the species-  
294 poor oomycete data subset.

295 The average error rate of MinION reads was 10-15%, depending on the proportion of homopolymers in  
296 the marker gene region of particular species. Species possessing homopolymer-rich ITS markers were up to two  
297 orders of magnitude less common than in the Sequel run. This was also supported by relative prevalence of  
298 homopolymer-rich taxa in the ‘failed’ bin. We showed that this may substantially bias estimates of dominant  
299 fungal and perhaps oomycete taxa in specific samples and overall.

300 We observed discrimination against longer reads when sequencing potato amplicons using the 1D<sup>2</sup>  
301 approach (ONT2f), which confirms a previous report (CUSCO et al., 2018). Preferential recovery of shorter reads

302 seems to be inherent to both PCR and all sequencing instruments including Sequel (Tedersoo et al., 2018, 2019;  
303 Nilsson et al., 2019).

304 Using the same amplicon pools, Sequel and MinION revealed contrasting results in metabarcoding of  
305 conifer needle and potato samples. The results of Sequel were generally consistent with morphology-based and  
306 species-specific priming PCR diagnosis (needle samples) and Sanger sequencing results (potato samples), but  
307 failed to differentiate the closely related needle pathogens *D. pini* and *D. septosporum*. Apart from the species of  
308 *Coniothyrium* contaminating the MinION data sets, the two platforms revealed different taxa (by names and  
309 INSD accessions) prevailing in the same samples. In some cases, these taxa are considered synonyms (e.g. *M.*  
310 *tassiana* and *C. herbarum*), but mostly these belong to closely related sister taxa that share the UNITE Species  
311 Hypothesis at 2% level as confirmed by manual comparisons of best-matching reads. In nearly 20% of occasions,  
312 inconsistencies between MinION and Sequel were attributable to the poor recovery of taxa with abundant  
313 homopolymers in ITS sequences by MinION. Possibilities to solve this include lowering of the initial phred score  
314 or including the ‘failed’ reads in analyses.

315  
316 **Rapid molecular diagnostics** We tested both metagenomics- and amplicon-based approaches of nanopore  
317 sequencing for rapid identification of pathogens. Most taxa recovered in the metagenome run were rare in the  
318 amplicon data set and vice versa. Although we detected severe biases in MinION amplicon sequencing, we  
319 believe that amplicon-based analyses are more accurate and that reference bias accounts for much of the  
320 difference; i.e., in metagenomics analyses, species with available reference genomes have much greater chance of  
321 accumulating hits compared with species with no available genomes. In our analyses, this is illustrated by  
322 misidentification of potato as a tomato. Mapping reads of an ascomycete pathogen to genomes of several others,  
323 as in our study, is likely to remain cryptic. A solution may be sufficiently deep metagenomics sequencing to  
324 secure coverage of mitochondrial or ITS marker genes that are in multiple copies per genome. Because genomes  
325 of most bacterial and fungal human pathogens have available genome sequences, nanopore metagenomics-based  
326 identification may be better suited to medical samples, but this situation is likely to improve very soon in plant  
327 pathology.

328 We demonstrate that accurate molecular identification from sample collection through DNA extraction,  
329 concentration, library preparation, sequencing, bioinformatics and taxonomic interpretation may take as little as  
330 two and half hours using MinION sequencing in the metagenome mode. This is less than the four hours reported  
331 for identification of bacterial human pathogens from urine, which requires no specific DNA extraction (Schmidt  
332 et al., 2017), and one working day as commonly reported in multiple studies (e.g. Quick et al., 2016; Votintseva et  
333 al., 2017; Charalampous et al., 2018). The protocols for plant and animal tissues can be potentially optimised to  
334 90 minutes in cases where DNA is easily extractable in high quantity and purity; library preparation and  
335 sequencing process can be limited to 10-20 minutes each, when using rapid library kits and halting efficient  
336 sequencing runs after a critical number of reads (Votintseva et al., 2017). These express diagnostics rates of  
337 MinION cannot be beaten by instruments of other HTS platforms that require several hours for library preparation  
338 and at least one day for sequencing (except 6 hours for Ion Torrent; Reuter et al., 2015).

339 However, there is a clear trade-off between overall analysis time and data reliability in nanopore  
340 sequencing. Shortened DNA extraction protocols tend to yield lower quality and quantity of DNA, whereas culled  
341 incubation and centrifugation steps in library preparation may result in dilute and poorly indexed libraries  
342 overrepresented by short fragments. Although we successfully identified potato pathogens from a library 13-fold  
343 more dilute than recommended, it may be useful to add a certain amount of so-called carrier DNA to secure  
344 preparation of high-quality libraries (cf. Mojarro et al., 2018). Sequencing time is almost linearly related to  
345 sequencing depth and thus quality of consensus reads and genome or taxonomic coverage. Sample preparation,  
346 bioinformatics and interpretation processes take longer for multiplexed samples, which may be necessary to  
347 reduce the overall analytical costs of 500-800 EUR per sample to ca 100 EUR per sample using Oxford  
348 Nanopore's commercial multiplexing kits or to 2-3 EUR per sample by using custom multiplexing methods of  
349 indexed primers. For example, analytical costs for the ONT1 and ONT2 runs were roughly 10 EUR per sample  
350 considering triple use of flowcells. To reduce the chances of carryover of previous molecules, contamination-  
351 aware indexes (different indexes across runs) could be used.

352

353 **Technical and analytical issues** Although several authors report species-level identification of bacterial taxa in  
354 complex communities using MinION (e.g. Shin et al., 2016; Kerkhof et al., 2017), these interpretations are not  
355 convincing, because mapping of sequences with 10-25% errors to reference reads of high similarity is inaccurate  
356 (see above). We demonstrate that even when using the relatively rapidly evolving fungal ITS region and reference  
357 sequences differing from each other by at least 2%, positive control samples and plant material yield multiple  
358 OTUs, sometimes recovering strongest hits to different genera. Conversely, species absent from databases are  
359 mapped to one or more closest species, which may provide wrong taxonomic implications. This is of particular  
360 importance for molecular diagnostics, necessitating inclusion of marker genes of all potential target species in the  
361 reference database to prevent incorrect interpretation. This issue is particularly pressing for long rRNA amplicons  
362 and single-copy genes. The metagenomics approach requires a comprehensive database of genomes of all  
363 potential target organisms, which strongly depends on whole genome sequencing initiatives. Exome compilations  
364 are suboptimal, because much of the eukaryotic DNA is non-coding. Besides target organisms, metagenomics  
365 databases also require inclusion of potential contaminants such as specific interacting taxa (e.g. potato) and  
366 human, and various bacteria that contribute much to the metagenomic DNA.

367 A major concern with novel sequencing techniques is the paucity of reports on analytical shortfalls, and  
368 nature of artefacts, which may partly be derived from the lack of controls or inappropriate sampling design  
369 (Pontefract et al., 2018). The MinION has been used for five years, but so far there is very little information about  
370 analytical errors and biases, and very few authors mention about checking chimeras, index switching artefacts or  
371 unsuccessful runs (but see White et al., 2017; Cusco et al., 2018; Xu et al., 2018). The virtual lack of constructive  
372 (self)criticism echoes a misleading message about the multi-purpose, non-problematic use of the method, serving  
373 the interests of the manufacturer and journal editors in an unjustified manner. Users of MinION, many of which  
374 have no prior experience with other HTS techniques and related problems, heavily struggle to squeeze reasonable  
375 data out of the device. There are thousands of academic users, but only a few hundred papers out. For example,  
376 our team purchased MinION instruments with extra troubleshooting service; yet, the company responded only to  
377 technical questions but not to troubleshooting about index switching, contamination and sequence carry-over. It  
378 should be the responsibility of researchers and editors to include such problematic issues and solutions in

379 publications to prevent the research community and specialists of governmental and private institutions from  
380 wasting countless time (re)falling into the same analytical holes.

381  
382 **Perspectives of third-generation sequencing technologies** Both MinION and Sequel are rapidly evolving in  
383 terms of read length and base calling accuracy. At the moment, Sequel seems to be the best choice for  
384 metabarcoding regular-size (600-1000 bp) and long (up to 3 kb) amplicons (Cline et al., 2015; Kyaschenko et al.,  
385 2017; Tedersoo et al., 2018; Nilsson et al., 2019; Tedersoo et al., 2019) and for barcoding ultra-long markers (up  
386 to 7 kb; Wurzbacher et al., 2019). The forthcoming M8 chemistry will reduce the costs of PacBio sequencing  
387 roughly two-fold. Declining costs, greater throughput, read length and quality continue to make Sequel more  
388 attractive for metabarcoding and seek supporters from metagenome and metatranscriptome researchers (Rard,  
389 2018). However, it may be hard to convince users of Illumina MiSeq to switch to another platform and adopt  
390 alternative bioinformatics workflows.

391 Use of MinION for metabarcoding looks relatively less promising considering the current state-of-the-art  
392 technology with unacceptably high error rates. The error rates should be reduced to <0.1%, i.e. to the level of  
393 Illumina and circular consensus of Sequel for use in routine metabarcoding. Several methods of tandem repeat  
394 (concatemer) sequencing enable to reduce error rates to 1-3% (Li et al., 2016; Calus et al., 2018; Volden et al.,  
395 2018). Double-barcoding of each size-selected RNA or DNA molecule followed by generation of consensus  
396 sequences yields quality improvements comparable to tandem repeat sequencing (Karst et al., 2018), but it would  
397 require ultra-high sequencing depth to reach 1% error rate and to be able to multiplex over several biological  
398 samples. Combining these methods may facilitate reducing error rates towards the critical threshold.

399 For regular barcoding, the third-generation sequencing tools offer great promise in situations where their  
400 throughput and read length are much superior compared to double-pass Sanger sequencing, i.e. for barcodes  
401 >1000 bases and multiplexing hundreds of samples to secure cost-efficiency (Hebert et al., 2018; Srivathsan et al.,  
402 2018). Sanger sequencing handles poorly the alleles or copies of markers with read length polymorphism, which  
403 is common in non-coding regions of eukaryotes. The third-generation HTS technologies are able to recover  
404 various alleles as well as pseudogenes (Cornelis et al., 2019) from mixed or contaminated samples by sequencing



405 single DNA molecules. Sequel and MinION are capable of handling DNA amplicons of >7000 bases, requiring  
406 generation of consensus reads for reliable results (Wurzbacher et al., 2019). Although we could reach 99.5%  
407 accuracy with over 100 reads, Pomerantz et al. (2018) estimated that 100 MinION reads suffice for principally  
408 error-free generation of barcodes for animals using sequences from a complementary strand. For PacBio, a single  
409 read may be enough for reads around 2000 bp, but three or more may be needed for longer fragments and to  
410 average over PCR errors.

411 Unlike Sequel and other HTS technologies, MinION is well-suited to rapid diagnostics of pathogens and  
412 invasive species especially in groups that are well-known and well-referenced in public sequence databases.  
413 Besides detection of pathogenic species, MinION has a potential to recover antibiotic resistance genes and  
414 pathogenesis-related genes as well as single mutations in the metagenomics mode (Bradley et al., 2015; Cornelis  
415 et al., 2019). By using multiplex amplicons or metagenomics/genomics approach, it will be possible to detect  
416 harmful organisms and their specific pathogenicity-related genomic features in less than one day (Schmidt et al.,  
417 2017). Besides enabling to trace taxon/gene exchange between different habitats (Bahram et al., 2018), this  
418 approach has important implications for improving diagnosis and implementing countermeasures, e.g. releasing  
419 biocontrol agents, spraying biocides or arranging quarantine.

420 Nanopore-based detection methods are flexible for incorporating additional options such as recording  
421 epigenetic modifications (Jain et al., 2016; Simpson et al., 2017) and primary structure of RNA (Garalde et al.,  
422 2018), proteins (Perez-Restrepo et al., 2018) and polysaccharides (Karawdeniya et al., 2018). Alternative  
423 nanopore-based DNA sequencing methods are also evolving (Goto et al., 2018). The potential of different  
424 nanopores to record various biomolecules indicates great promise of nanopore-based diagnostics in the future.

425  
426 **Conclusion** We demonstrate that the MinION device is well-suited for rapid and accurate diagnosis of pathogens,  
427 which may take as little as 150 minutes from sample preparation (including DNA extraction, library preparation,  
428 sequencing, bioinformatics and data interpretation). However, care should be taken to secure profound reference  
429 sequence data to avoid misdiagnosis. Amplicon-based diagnostics takes longer time, but is more accurate if  
430 genomes of potential pathogens are unavailable. For whole-community metabarcoding, Sequel performs much

431 better than MinION in terms of data quality and analytical biases. Although development of tandem repeat  
432 sequencing and read consensus sequencing have been developed for MinION, their error rate of 1-3% is still  
433 insufficient for exploratory metabarcoding analyses of biodiversity, but this may change in the coming years.  
434

## 435 MATERIALS AND METHODS

436

437 **Sample preparation** The potato subset includes 27 samples of leaves and 10 samples of tubers with symptoms of  
438 disease (Table 5). We also included a DNA sample of two Australian Tuberaeae species as a positive control.  
439 The conifer system includes 36 distinct needle samples from eight species of *Pinus* and two species of *Picea* that  
440 represent material with symptoms of needle blight or no symptoms. The samples of natural, planted or recently  
441 imported trees were collected in Estonia in 2011-2018 (Table 6). We included a cultured isolate of *D. pini*  
442 (146889), *D. septosporum* (150931) and closely related *Lecanosticta acicola* (150943) as positive controls.  
443 Unequal mixture of DNA from these cultures served as a simple mock community. In both systems, we included  
444 a negative control sample.

445 In needle samples, DNA from 0.2 g plant material and fungal cultures was extracted using the Thermo  
446 Scientific GeneJET Genomic DNA Purification Kit (Thermo Fisher Scientific, EU). In potato samples, DNA from  
447 0.1 g diseased fresh leaf tissue was extracted with a lysis buffer (0.8 M Tris-HCl, 0.2 M (NH<sub>4</sub>)<sub>2</sub>SO<sub>4</sub>, 0.2% w/v  
448 Tween-20; Solis BioDyne, Tartu, Estonia). For some additional analyses using potato samples, we also used Phire  
449 Plant Direct PCR Kit (Thermo Scientific, Waltham, MA, USA).

450  
451 **Molecular identification** Needle samples were screened for specific pathogenic fungi *Dothiostroma pini*, *D.*  
452 *septosporum* and *Lecanosticta acicola*, using species-specific primer pairs following the developers' protocols  
453 (Ioos et al., 2010). Potato samples were amplified using the ITS1F + ITS4 primer pair (White et al., 1990; Gardes  
454 & Bruns, 1993) and sequenced using the ITS5 primer (White et al., 1990).

455 For the metabarcoding approach, we used a forward primer ITS1catta (5'-  
456 ACCWGC GGARGGATCATT A-3'; Tedersoo et al. submt.) and a reverse primer ITS4ngsUni (Tedersoo &

457 Lindahl, 2016) to be able to selectively amplify fungal DNA and simultaneously avoid the 18S rRNA gene intron  
458 bias. Located in the terminus of the 18S rRNA gene, the ITS1catta primer covers nearly all Ascomycota and  
459 Basidiomycota as well as selected groups of ‘zygomycetes’ and ‘early diverging lineages’, but discriminates  
460 against plants and most other eukaryote groups (incl. fungal taxa Mortierellomycota and Tulasnellaceae) in the  
461 last position. To specifically detect Oomycota, we used the ITS1Oo primer (Riit et al., 2016, 2018) in  
462 combination with the ITS4ngsUni primer for the potato data set. Forward primers were tagged with one of the 12-  
463 base Golay indexes with at least four differences to any other index (Tederloo et al., 2018). Because of issues in  
464 data recovery, we also amplified a subset of eight potato samples (KL001-KL008) using ITS1catta and  
465 ITS4ngsUni primers in which the forward primer was equipped with tandem repeat barcode of double length  
466 (securing at least 8 base difference) to increase resolution among samples. Because the 1D<sup>2</sup> nanopore sequencing  
467 method requires DNA fragments of >2kb, we amplified these potato samples (>3 kb amplicons) using the indexed  
468 ITS1catta primer combined with the LR14 primer (Vilgalys & Hester, 1990). For comparing the metabarcoding  
469 approach to metagenomics method, we used ITS1catta in combination with the LR11 primer (Vilgalys & Hester,  
470 1990) that yielded stronger amplicons compared with LR14. We used negative and positive controls as above.

471 PCR was performed in 25 µl volume comprising 0.5 µl each of the tagged primer (20 µM), 5 µl HOT  
472 FIREPol Blend Master Mix (Solis Biodyne), 1 µl DNA extract and 18 µl ddH<sub>2</sub>O. Thermocycling conditions  
473 included an initial 15 min denaturation at 95 °C, 30 cycles of 30 sec denaturation, 30 sec annealing at 55 °C and  
474 60 sec elongation at 72 °C, and a final 10 min elongation before hold at 4 °C. The number of cycles was increased  
475 to 35 or 38 for some samples to yield a visible amplicon on 1% agarose gel. For the ITS1Oo + ITS4ngsUni primer  
476 combination, 40 PCR cycles at 50 °C annealing was used to secure greater product recovery. The two replicate  
477 amplicons were pooled, checked on a gel, and mixed with amplicons of other samples in roughly equal  
478 proportions based on visual estimates of band size.

479  
480 **Third-generation sequencing** The mixed amplicons of potato and those of needles were separately split into  
481 library preparation for Sequel and MinION. The two PacBio libraries were sequenced on a Sequel instrument  
482 using the same SMRT cell (SMRT cell 1M, v2; Sequel Polymerase v2.1, sequencing chemistry v2.1., loading by

483 diffusion, movie time 600 min, pre-extension time 30 min). PacBio CCS reads (minPasses=3, MinAccuracy=0.9)  
484 were generated using SMRT Link v 6.0.0.47841 (Pacific Biosciences). Subsequent bioinformatics were  
485 performed using PipeCraft 1.0 (Anslan et al., 2017) that included steps of demultiplexing (2 mismatches to primer  
486 and 1 mismatch to tag), extraction of the ITS region (ITSx: default options; Bengtsson-Palme et al., 2013),  
487 chimera removal (UCHIME: de novo and reference-based methods combined; Edgar et al., 2011; and additional  
488 filtering option „remove primer artefacts“ that removes chimeric sequences where the full length primer is found  
489 somewhere in the middle of the read), clustering (UPARSE: 98% sequence similarity threshold; Edgar, 2013),  
490 taxonomic identification (BLASTn: e-value=0.001, word size=7, reward=1, penalty=-1, gap open=1, gap  
491 extend=2; Camacho et al., 2009) against UNITE 7.2 (Kõljalg et al., 2013) reference database. We used the criteria  
492 of blast e-value <e-40 and sequence similarity >75% for the kingdom level identification, and e-value <e-50 for  
493 phylum and class-level identification.

494 For the MinION instrument, amplicon library preparation was performed using the 1D amplicon/cDNA  
495 by Ligation (SQK-LSK109) kit (Oxford Nanopore) using R9.4 flowcells following manufacturer’s instructions.  
496 For long fragments, we also used the 1D<sup>2</sup> sequencing of genomic DNA (SQK-LSK308) kit on R9.5 flowcell,  
497 following the producer’s protocols. Flowcells were used 1-3 times, being cleaned once or twice using the Wash  
498 Kit (EXP-WSH002; Oxford Nanopore). Sequencing was performed in the laboratory at room temperature,  
499 connecting the MinION device to a plugged-in, internet-connected laptop computer with four processors and 32  
500 GB RAM. For base calling in MinKnow 3.1.19 software (Oxford Nanopore), we used the default phred score =  
501 11, which placed the reads into ‘passed’ and ‘failed’ bins. The ‘passed’ fasta-formatted reads (additionally ‘failed’  
502 reads in some analyses) were further subjected to bioinformatics using PipeCraft and WIMP (Juil et al., 2015) in  
503 parallel. The options in PipeCraft included demultiplexing of metabarcoding reads allowing no mismatches to the  
504 barcode, followed by blastn search using default settings. The sequencing adaptors were removed by a custom  
505 script.

506 Given the poor overall sequence quality, traditional OTU-based approaches are not applicable to the  
507 MinION data; therefore, we mapped reads based on their best matches to database sequences in the UNITE

reference database, following previous nanopore sequencing studies (Benitez-Paez et al., 2016; Kerkhof et al., 2017). Limitations of this approach are outlined in the Discussion.

To maximize the speed of pathogen diagnosis, we used a metagenomics-based approach with the MinION instrument. For this, we concentrated the genomic DNA of select potato samples using FavorPrep Gel/PCR Purification kit (Favorgen Biotech Corp., Vienna, Austria). For library preparation, the Rapid Sequencing kit (SQK-RAD004) and Rapid Barcoding Sequencing kit (SQK-RBK004) were used following manufacturer's instructions. Base calling was performed as described above. Both 'passed' and 'failed' sequences were used in further bioinformatics analyses as implemented in the Pipecraft. Taxonomic reference libraries included UNITE 7.2 and SILVA 132 (Quast et al., 2013), and INSD for extracted rRNA gene reads and other reads separately. The UNITE database was merged with a database of oomycetes created based on ITS sequences in INSD. Using this reference, chimera checking was performed using Uchime on demultiplexed reads. Specific information about the amount of initial material, sequencing time and sequencing runs is given in Table 1.

Sanger sequences of potato samples have been deposited in the UNITE database (<https://unite.ut.ee/>; accessions UDBxxxxx-UDBxxxxx). Raw sequence data of MinION and Sequel are available from the PlutoF digital repository. Sample-by-OTU tables used in these analyses are given in supplementary material (Tables S1 and S2).

## ACKNOWLEDGEMENTS

We thank V. Kisand for constructive comments on the manuscript and A. Tooming-Klunderud for running PacBio sequencing. Financial contribution was provided by the Estonian Science Foundation (grants PUT1399, PUT1317, PSG136, IUT21-04, IUT 36-2, MOBERC13, ECOLCHANGE). Author contributions: KL, RD and LT designed the study; RK, KL, KA and RD provided material; RP and KL performed HTS analyses; MB, SA and LT analyzed data; LT wrote the paper with input from all co-authors.

534

## 535 APPENDIX

### 536 Additional File 1:

537 **Table S1** Sample-by-OTU table of metabarcoding studies of conifer needles.

538

539 **Table S2** Sample-by-OTU table of metabarcoding studies of potato tissues.

540

## 541 REFERENCES

542

543 Anslan S, Bahram M, Hiiesalu I, Tedersoo L. 2017. PipeCraft: Flexible open-source toolkit for bioinformatics  
544 analysis of custom high-throughput amplicon sequencing data. *Mol Ecol Res* 17:e234–e240.

545 Ashikawa S, Tarumoto N, Imai K, Sakai J, Kodana M, Kawamura T, Ikebuchi K, Murakami T, Mitsutake K,  
546 Maesaki S, Maeda T. Rapid identification of pathogens from positive blood culture bottles with the MinION  
547 nanopore sequencer. *J. Med Microbiol* 67:1589-1595.

548 Bengtsson-Palme J, Ryberg M, Hartmann M, Branco S, Wang Z, Godhe A, de Wit P, Sanchez-Garcia M,  
549 Ebersberger I, de Sousa F, Amend AS, Jumpponen A, Unterseher M, Kristiansson E, Abarenkov K, Bertrand  
550 YJK, Sanli K, Eriksson KM, Vik U, Veldre V, Nilsson RH. 2013. Improved software detection and extraction of  
551 ITS1 and ITS2 from ribosomal ITS sequences of fungi and other eukaryotes for analysis of environmental  
552 sequencing data. *Meth Ecol Evol* 4:914-919.

553 Benitez-Paez A, Portune KJ, Sanz Y. 2016. Species-level resolution of 16S rRNA gene amplicons sequenced  
554 through the MinION™ portable nanopore sequencer. *GigaScience* 5:4.

555 Benitez-Paez A, Sanz Y. 2017. Multi-locus and long amplicon sequencing approach to study microbial diversity  
556 at species level using the MinION portable nanopore sequencer. *GigaScience* 6:1-12.

557 Bik HM, Porazinska D, Creer S, Caporaso JG, Knight R, Thomas WK. 2012. Sequencing our way towards  
558 understanding global eukaryotic biodiversity. *Trends Ecol Evol* 27:233-243.

559 Bradley P, Gordon NC, Walker TM, Dunn L, Heys S, Huang B, Earle S, Pankhurst LJ, Anson L, De Cesare M,  
560 Piazza P. 2015. Rapid antibiotic-resistance predictions from genome sequence data for *Staphylococcus aureus*  
561 and *Mycobacterium tuberculosis*. *Nature Comm* 6:10063.

562 Bronzato Badial A, Sherman D, Stone A, Gopakumar A, Wilson V, Schneider W, King J. 2018. Nanopore  
563 sequencing as a surveillance tool for plant pathogens in plant and insect tissues. *Plant Dis* 20:PDIS-04.

564 Calus ST, Ijaz UZ, Pinto AJ. 2018. NanoAmpli-Seq: A workflow for amplicon sequencing for mixed microbial  
565 communities on the nanopore sequencing platform. *GigaScience* 7:140.

566 Camacho C, Coulouris G, Avagyan V, Ma N, Papadopoulos J, Bealer K, Madden TL. 2009. BLAST+:  
567 architecture and applications. *BMC Bioinform* 10:421.

568 Castro-Wallace SL, Chiu CY, John KK, Stahl SE, Rubins KH, McIntyre AB, Dworkin JP, Lupisella ML, Smith  
569 DJ, Botkin DJ, Stephenson TA. 2017. Nanopore DNA sequencing and genome assembly on the International  
570 Space Station. *Sci Rep* 7:18022.

571 Charalampous T, Richardson H, Kay GL, Baldan R, Jeanes C, Rae D, Grundy S, Turner DJ, Wain J, Leggett RM,  
572 Livermore DM. 2018. Rapid Diagnosis of Lower Respiratory Infection using Nanopore-based Clinical  
573 Metagenomics. *BioRxiv* 2018:387548.

574 Cline LC, Zak DR. 2015. Initial colonization, community assembly and ecosystem function: fungal colonist traits  
575 and litter biochemistry mediate decay rate. *Mol Ecol* 24:5045–5058.

576 Comtet T, Sandionigi A, Viard F, Casiraghi M. 2015. DNA (meta)barcoding of biological invasions: a powerful  
577 tool to elucidate invasion processes and help managing aliens. *Biol Invas* 17:905–922.

- 578 Cornelis S, Gansemans Y, Vander Plaetsen AS, Weymaere J, Willems S, Deforce D, Van Nieuwerburgh F. 2019.  
579 Forensic tri-allelic SNP genotyping using nanopore sequencing. *For Sci Int Genet* 38:204-210.
- 580 Costello M, Fleharty M, Abreu J, Farjoun Y, Ferriera S, Holmes L, Granger B, Green L, Howd T, Mason T,  
581 Vicente G. 2018. Characterization and remediation of sample index swaps by non-redundant dual indexing on  
582 massively parallel sequencing platforms. *BMC Genomics* 19:332.
- 583 Cusco A, Catozzi C, Vines J, Sanchez A, Francino O. 2018. Microbiota profiling with long amplicons using  
584 Nanopore sequencing: full-length 16S rRNA gene and whole *rrn* operon. *F1000Research*. 2018:7.
- 585 Edgar RC, Haas BJ, Clemente JC, Quince C, Knight R. 2011. UCHIME improves sensitivity and speed of  
586 chimera detection. *Bioinformatics* 27:2194-2200.
- 587 Edgar RC. 2013. UPARSE: highly accurate OTU sequences from microbial amplicon reads. *Nature Meth* 10:996–  
588 998.
- 589 Eid J, Fehr A, Gray J, Luong K, Lyle J, Otto G, Peluso P, Rank D, Baybayan P, Bettman B, Bibillo A. 2009.  
590 Real-time DNA sequencing from single polymerase molecules. *Science* 323:133-138.
- 591 Garalde DR, Snell EA, Jachimowicz D, Sipos B, Lloyd JH, Bruce M, Pantic N, Admassu T, James P, Warland A,  
592 Jordan M. 2018. Highly parallel direct RNA sequencing on an array of nanopores. *Nature Meth* 15:201-208.
- 593 Giordano F, Aigrain L, Quail MA, Coupland P, Bonfield JK, Davies RM, Tischler G, Jackson DK, Keane TM, Li  
594 J, Yue JX. De novo yeast genome assemblies from MinION, PacBio and MiSeq platforms. *Sci Rep*. 2017 Jun  
595 21;7(1):3935.
- 596 Goto Y, Yanagi I, Matsui K, Yokoi T, Takeda KI. 2018. Identification of four single-stranded DNA  
597 homopolymers with a solid-state nanopore in alkaline CsCl solution. *Nanoscale* 10:20844-50.
- 598 Hebert PD, Braukmann TW, Prosser SW, Ratnasingham S, Ivanova NV, Janzen DH, Hallwachs W, Naik S,  
599 Sones JE, Zakharov EV. 2018. A Sequel to Sanger: amplicon sequencing that scales. *BMC Genomics* 19:219.
- 600 Hildebrand F, Tadeo R, Wright AY, Bork P, Raes J. 2014. LotuS: an efficient and user-friendly OTU processing  
601 pipeline. *Microbiome* 2:30.
- 602 Hu Y, Green G, Milgate A, Stone E, Rathjen J, Schwessinger B. 2019. Pathogen detection and microbiome  
603 analysis of infected wheat using a portable DNA sequencer. *bioRxiv* 2019:429878.
- 604 Hyde KD, Udayanga D, Manamgoda DS, Tedersoo L, Larsson E, Abarenkov K, Bertrand Y, Oxelman B,  
605 Hartmann M, Kausserud H, Ryberg M, Kristiansson E, Nilsson RH. 2013. Incorporating molecular data in fungal  
606 systematics: a guide for aspiring researchers. *Curr Res Environ Appl Mycol* 3:1-32.
- 607 Jain M, Koren S, Miga KH, Quick J, Rand AC, Sasani TA, Tyson JR, Beggs AD, Dilthey AT, Fiddes IT, Malla S.  
608 2018. Nanopore sequencing and assembly of a human genome with ultra-long reads. *Nature Biotechnol* 36:338.
- 609 Johnson SS, Zaikova E, Goerlitz DS, Bai Y, Tighe SW. 2017. Real-time DNA sequencing in the Antarctic dry  
610 valleys using the Oxford Nanopore sequencer. *J Biomol Techn* 28:2.
- 611 Juul S, Izquierdo F, Hurst A, Dai X, Wright A, Kulesha E, Pettett R, Turner DJ. 2015. What's in my pot? Real-  
612 time species identification on the MinION. *bioRxiv* 2015:030742.
- 613 Karawdeniya BI, Bandara YN, Nichols JW, Chevalier RB, Dwyer JR. 2018. Surveying silicon nitride nanopores  
614 for glycomics and heparin quality assurance. *Nature comm* 9:3278.
- 615 Karlsson I, Edel Hermann V, Gautheron N, Durling MB, Kolseth AK, Steinberg C, Persson P, Friberg H. 2016.  
616 Genus-specific primers for study of *Fusarium* communities in field samples. *Appl Environ Microbiol* 82:491-  
617 501.
- 618 Karst SM, Dueholm MS, McIlroy SJ, Kirkegaard RH, Nielsen PH, Albertsen M. 2016. Retrieval of a million  
619 high-quality, full-length microbial 16S and 18S rRNA gene sequences without primer bias. *Nature Biotechnol*  
620 36:190–195.
- 621 Kashyap PL, Rai P, Kumar S, Chakdar H, Srivastava AK. 2017b. DNA barcoding for diagnosis and monitoring of  
622 fungal plant pathogens. In: Singh BP, Gupta VK (eds). *Molecular Markers in Mycology*. Pp. 87-122.
- 623 Kerkhof LJ, Dillon KP, Häggblom MM, McGuinness LR. 2017. Profiling bacterial communities by MinION  
624 sequencing of ribosomal operons. *Microbiome* 5:116.
- 625 Kilianski A, Haas JL, Corriveau EJ, Liem AT, Willis KL, Kadavy DR, Rosenzweig CN, Minot SS. 2016.  
626 Bacterial and viral identification and differentiation by amplicon sequencing on the MinION nanopore  
627 sequencer. *Gigascience* 4:12.

- 628 Kõljalg U, Nilsson RH, Abarenkov K, Tedersoo L, Taylor AFS, Bahram M et al. 2013. Towards a unified  
629 paradigm for sequence-based identification of Fungi. *Mol Ecol* 22:5271–5277.
- 630 Kyaschenko Y, Clemmensen K, Hagenbo A, Karlton E, Lindahl B. 2017. Shift in fungal communities and  
631 associated enzyme activities along an age gradient of managed *Pinus sylvestris* stands. *ISME J* 11:863–874.
- 632 Lu H, Giordano F, Ning Z. 2016. Oxford Nanopore MinION sequencing and genome assembly. *Gen Prot &*  
633 *Bioinform* 14:265-279.
- 634 Mikheyev AS, Tin MMY. 2014. A first look at the Oxford Nanopore MinION sequencer. *Mol Ecol Res* 14:1097–  
635 1102.
- 636 Mojarro A, Hachey J, Ruvkun G, Zuber MT, Carr CE. 2018. CarrierSeq: a sequence analysis workflow for low-  
637 input nanopore sequencing. *BMC Bioinform* 19:108.
- 638 Mosher JJ, Bowman B, Bernberg EL, Shevchenko O, Kan J, Korlach J. 2014. Improved performance of the  
639 PacBio SMRT technology for 16S rDNA sequencing. *J of Microbiol Meth* 104:59–60.
- 640 Nilsson RH, Anslan S, Bahram M, Wurzbacher C, Baldrian P, Tedersoo L. 2019. Mycobiome diversity: high-  
641 throughput sequencing and identification of fungi. *Nature Rev Microbiol*, in press.
- 642 Pomerantz A, Peñafiel N, Arteaga A, Bustamante L, Pichardo F, Coloma LA, Barrio-Amorós CL, Salazar-  
643 Valenzuela D, Prost S. 2018. Real-time DNA barcoding in a rainforest using nanopore sequencing:  
644 opportunities for rapid biodiversity assessments and local capacity building. *GigaScience* 7:033.
- 645 Pontefract A, Hachey J, Zuber MT, Ruvkun G, Carr CE. 2018. Sequencing nothing: Exploring failure modes of  
646 nanopore sensing and implications for life detection. *Life Sci Space Res* 18:80-86.
- 647 Quast C, Pruesse E, Yilmaz P, Gerken J, Schweer T, Yarza P, Peplies J, Glöckner FO. 2013. The SILVA  
648 ribosomal RNA gene database project: improved data processing and web-based tools. *Nucl Ac Res* 41:D590–  
649 D596.
- 650 Quick J, Loman NJ, Duraffour S, Simpson JT, Severi E, Cowley L, Bore JA, Koundouno R, Dudas G, Mikhail A,  
651 Ouedraogo N. 2016. Real-time, portable genome sequencing for Ebola surveillance. *Nature* 530:228-232.
- 652 Quick J, Quinlan AR, Loman NJ. 2014. A reference bacterial genome dataset generated in the MinION portable  
653 single-molecule nanopore sequencer. *GigaScience* 3:22.
- 654 Rard T. 2018. Pacific Biosciences of California, Inc. Announces Third Quarter 2018 Financial Results. *Sci*  
655 *Technol News* 2018:11.1
- 656 Restrepo-Pérez L, Joo C, Dekker C. 2018. Paving the way to single-molecule protein sequencing. *Nature*  
657 *Nanotechnol* 13:786.
- 658 Reuter JA, Spacek DV, Snyder MP. 2015. High-throughput sequencing technologies. *Mol Cell* 58:586-597.
- 659 Rhoads A, Au KF. 2015. PacBio sequencing and its applications. *Gen Prot Bioinform* 13:278-289.
- 660 Riit T, Tedersoo L, Drenkhan R, Runno-Paurson E, Kokko H, Anslan S. 2016. Oomycete-specific ITS primers for  
661 identification and metabarcoding. *MycKeys* 14:17-30.
- 662 Riit T, Tedersoo L, Drenkhan R, Runno-Paurson E, Kokko H, Anslan S. 2018. Corrigendum for:“Oomycete-  
663 specific ITS primers for identification and metabarcoding” published in *MycKeys*. *MycKeys* 41:119.
- 664 Schloss PD, Westcott SL, Jenior ML, Highlander SK. 2016. Sequencing 16S rRNA gene fragments using the  
665 PacBio SMRT DNA sequencing system. *Peer J* 4:e1869.
- 666 Schmidt K, Mwaigwisya S, Crossman LC, Doumith M, Munroe D, Pires C, Khan AM, Woodford N, Saunders  
667 NJ, Wain J, O'grady J. 2017. Identification of bacterial pathogens and antimicrobial resistance directly from  
668 clinical urines by nanopore-based metagenomic sequencing. *J Antimicrob Chemother* 72:104–114.
- 669 Schnell IB, Bohmann K, Gilbert MTP. 2015. Tag jumps illuminated – reducing sequence-to-sample  
670 misidentifications in metabarcoding studies. *Mol Ecol Res* 15:1289–1303.
- 671 Shin J, Lee S, Go MJ, Lee SY, Kim SC, Lee CH, Cho BK. 2016. Analysis of the mouse gut microbiome using  
672 full-length 16S rRNA amplicon sequencing. *Sci Rep* 6:29681.
- 673 Simpson JT, Workman RE, Zuzarte PC, David M, Dursi LJ, Timp W. 2017. Detecting DNA cytosine methylation  
674 using nanopore sequencing. *Nature Meth* 14:407.
- 675 Srivathsan A, Baloglu B, Wang W, Tan WX, Bertrand D, Ng AH, Boey EJ, Koh JJ, Nagarajan N, Meier R. 2018.  
676 A Min ION™-based pipeline for fast and cost-effective DNA barcoding. *Mol Ecol Res* 18:1035-1049.
- 677 Tedersoo L, Drenkhan R, Anslan S, Morales-Rodrigues C, Cleary M. 2019. High-throughput identification and  
678 diagnostics of pathogens and pests: overview and practical recommendations. *Mol Ecol Res* 19: 47–76.



- 679 Tedersoo L, Lindahl B. 2016. Fungal identification biases in microbiome projects. *Environ Microbiol Rep.* 8:774-  
680 779.
- 681 Tedersoo L, Tooming-Klunderud A, Anslan S. 2018. PacBio metabarcoding of fungi and other eukaryotes: biases  
682 and perspectives. *New Phytol* 217:1370-1385.
- 683 Wagner J, Coupland P, Browne HP, Lawley TD, Francis SC, Parkhill J. 2016. Evaluation of PacBio sequencing  
684 for full-length bacterial 16S rRNA gene classification. *BMC Microbiol* 16:274.
- 685 Walder F, Schlaeppi K, Wittwer R, Held AY, Vogelgsang S, van der Heijden MG. 2017. Community profiling of  
686 *Fusarium* in combination with other plant-associated fungi in different crop species using SMRT sequencing.  
687 *Front Plant Sci* 2017:8.
- 688 Weirather JL, de Cesare M, Wang Y. 2017. Comprehensive comparison of Pacific Biosciences and Oxford  
689 Nanopore Technologies and their applications to transcriptome analysis. *F1000Research* 6:100.
- 690 Veldre V, Abarenkov K, Bahram M, Martos F, Selosse M-A, Tamm H, Kõljalg U, Tedersoo L. 2013. Evolution  
691 of nutritional modes of Ceratobasidiaceae (Cantharellales, Basidiomycota) as revealed from publicly available  
692 ITS sequences. *Fung Ecol* 6:256-268.
- 693 White R, Pellefigues C, Ronchese F, Lamiable O, Eccles D. 2017. Investigation of chimeric reads using the  
694 MinION. *F1000Research* 6:631.
- 695 Vilgalys R, Hester M. 1990. Rapid genetic identification and mapping of enzymatically amplified ribosomal DNA  
696 from several *Cryptococcus* species. *J Bacteriol* 172:4238-4246.
- 697 Volden R, Palmer T, Byrne A, Cole C, Schmitz RJ, Green RE, Vollmers C. 2018. Improving nanopore read  
698 accuracy with the R2C2 method enables the sequencing of highly multiplexed full-length single-cell cDNA.  
699 *Proc Natl Acad Sci USA* 115:9726-9731.
- 700 Votintseva AA, Bradley P, Pankhurst L, del Ojo Elias C, Loose M, Nilgiriwala K, Chatterjee A, Smith EG,  
701 Sanderson N, Walker TM, Morgan MR. 2017. Same-day diagnostic and surveillance data for tuberculosis via  
702 whole genome sequencing of direct respiratory samples. *J Clin Microbiol* 8:02483.
- 703 Wurzbacher C, Larsson E, Bengtsson-Palme J, Van den Wyngaert S, Svantesson S, Kristiansson E, Kagami M,  
704 Nilsson RH. 2018. Introducing ribosomal tandem repeat barcoding for fungi. *Mol Ecol Res* 19:118-127.
- 705  
706

707  
708 **FIGURE LEGENDS** [and figures]  
709

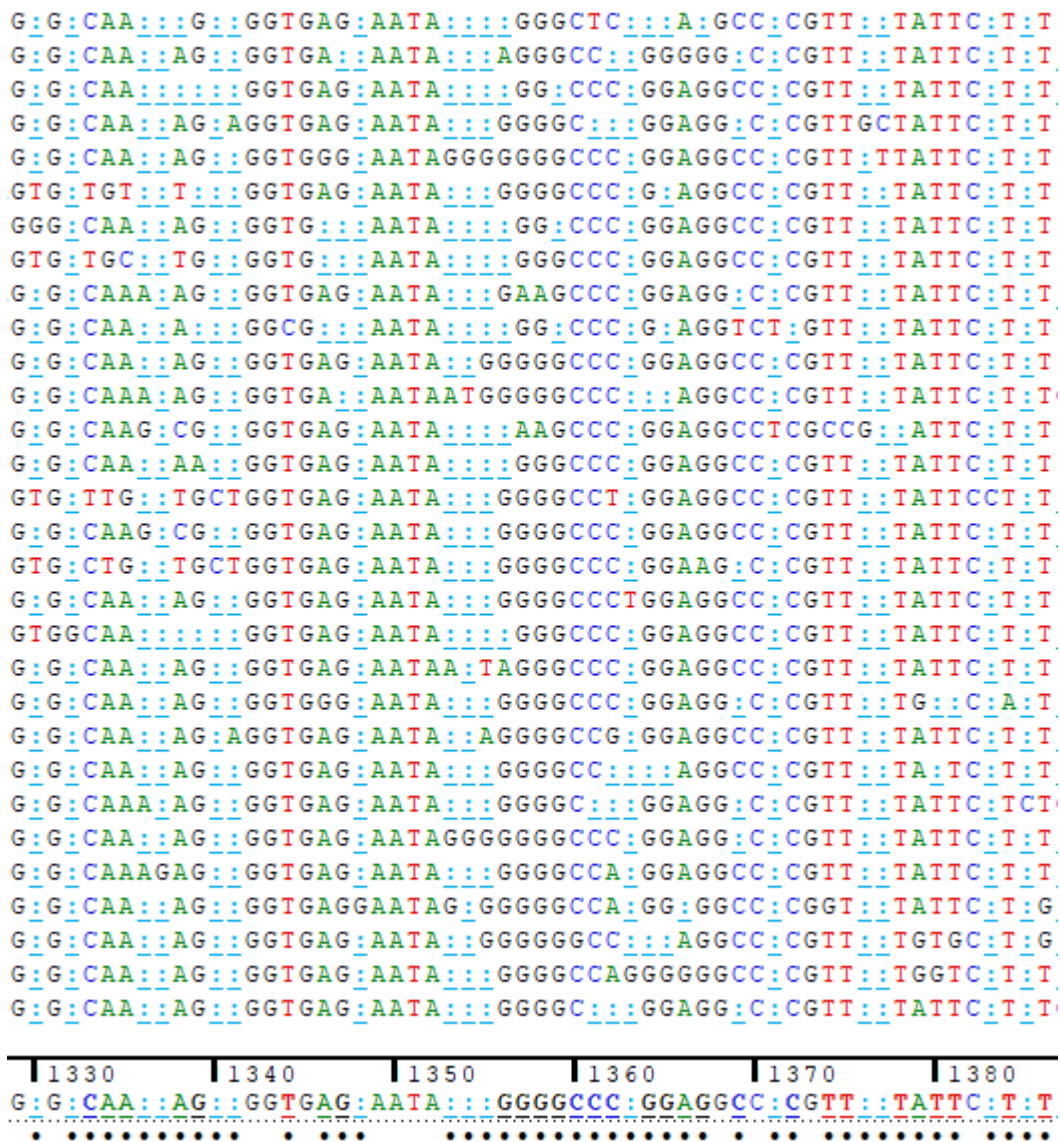

710  
711  
712 **FIG 1.** Screenshot example of multiple sequence alignment of MinION reads mapped to the contaminant  
713 *Coniothyrium* sp. using Sequencer 5.1 software (GeneCodes Corp., Ann Arbor, MI, USA). Note the error-  
714 infested double homopolymeric region (center) and a relatively accurately recorded region upstream.  
715

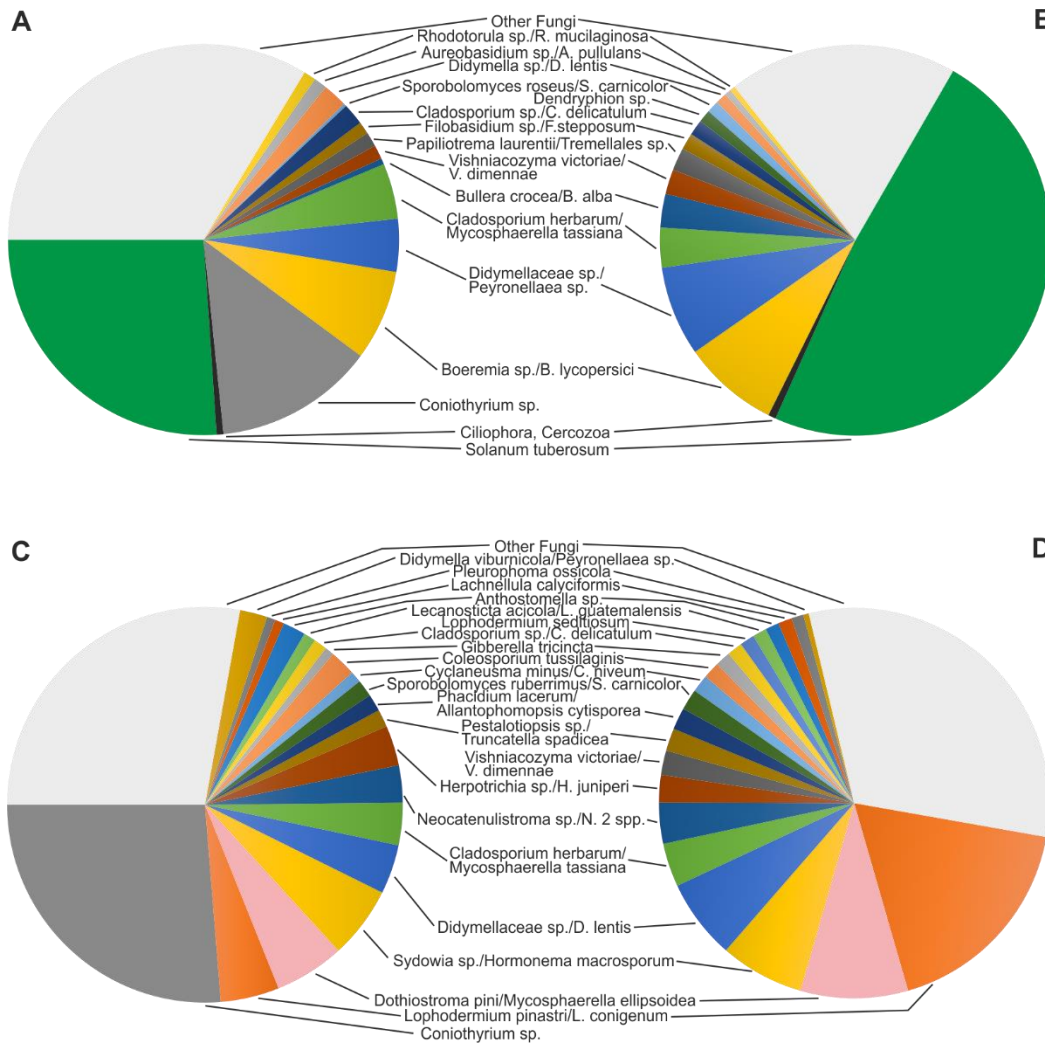

**FIG 2** Pie diagrams demonstrating dominance of higher taxa and OTUs in a) ONT1 (needles; MinION), b) ONT1S (needles; Sequel), c) ONT2 (potato; MinION) and ONT2S runs (potato; Sequel) based on relative abundance of identified reads in the ITS1catta + ITS4ngsUni amplicons. Taxon names in Sequel and MinION data sets have been put into correspondence (/).

**Table 1** Detailed information about MinION and Sequel runs

| Run ID (DNA quantity, ng) | Samples (n)          | Primers                | Chemistry             | Cell              | N <sup>o</sup> reads obtained/qualified (time, min) |
|---------------------------|----------------------|------------------------|-----------------------|-------------------|-----------------------------------------------------|
| ONT1 (1165)               | Conifer needles (36) | ITS1catta + ITS4ngsUni | MinION 1D: SQK-LSK109 | Flowcell #1 (new) | 1,053,693/ 186,586 (1440)                           |
| ONT1S (1000)              | Conifer needles      | ITS1catta +            | Sequel                | SMRT cell #1      | 167,864/ 121,965                                    |

|              |                                       |                                                                    |                                        |                                      |                                     |
|--------------|---------------------------------------|--------------------------------------------------------------------|----------------------------------------|--------------------------------------|-------------------------------------|
| ONT2 (2002)  | (36)<br>Potato leaves and tubers (35) | ITS4ngsUni<br>ITS1catta +<br>ITS4ngsUni;<br>ITS1Oo +<br>ITS4ngsUni | MinION 1D:<br>SQK-LSK109               | Flowcell #1<br>(2 <sup>nd</sup> use) | (600)<br>1,194,242/ 36,779<br>(343) |
| ONT2S (1000) | Potato leaves and tubers (35)         | ITS1catta +<br>ITS4ngsUni;<br>ITS1Oo +<br>ITS4ngsUni               | Sequel                                 | SMRT cell #2                         | 177,635/ 75,573<br>(600)            |
| ONT2a (1076) | Potato leaves (8)                     | ITS1catta) +<br>ITS4ngsUni                                         | MinION 1D:<br>SQK-LSK109               | Flowcell #1<br>(3rd use)             | 130,130/ 14,155<br>(260)            |
| ONT2b (926)  | Potato leaves (8)                     | ITS1catta +<br>ITS4ngsUni                                          | MinION 1D:<br>SQK-LSK109               | Flowcell #2<br>(new)                 | Failed                              |
| ONT2f (473)  | Potato leaves (8)                     | ITS1catta + LR1                                                    | MinION 1D <sup>2</sup> :<br>SQK-LSK308 | Flowcell #3<br>(new)                 | 5433/ 265 (77)                      |
| ONT2g (69)   | Potato tuber (1)                      | Metagenome                                                         | MinION 1D:<br>SQK-RAD004               | Flowcell 2 (2 <sup>nd</sup><br>use)  | 466,488/<br>66,133 (251)            |
| ONT2h (448)  | Potato tuber (1)                      | ITS1catta +<br>LR11                                                | MinION 1D:<br>SQK-LSK109               | Flowcell 2 (3rd<br>use)              | 767,611/ 342,923<br>(165)           |
| ONT2i (31)   | Potato tuber (1)                      | Metagenome                                                         | MinION 1D:<br>SQK-RAD004               | Flowcell 4<br>(new)                  | 1142/ 436 (50)                      |

730  
731  
732  
733  
734  
735

**Table 2** Identification of Fungi in needle samples. Numbers and percentages in Sequel and MinION columns indicate the number of fungal reads and per cent of sequences assigned to particular OTUs. Asterisks indicate taxon names that correspond to each other based on >98% sequence similarity.

| Sample ID | Species-specific primers: | Sequel (reads per sample: dominant taxa) | MinION (reads per sample: dominant taxa) |
|-----------|---------------------------|------------------------------------------|------------------------------------------|
| 115       | Negative                  | 6275: LoPi 35%, CoTu 27%, RhySp 3%       | 16543: CoSp 44%, CoTu 21%, HeJu 2%       |
| 117       | Negative                  | 5048: LoCo 49 %, DiSp 25%, ViVi 9%       | 14709: LoCo 42%, DiLe 13%, CoSp 12%      |
| 118       | LeAc                      | 5511: NeGe* 36%, DiSp 10%, SySp 9%       | 8109: NeAb* 17%, NeMi* 15%, CoSp 9%      |
| 119       | Negative                  | 4460: LoPi 34%, RhySp 16%, CySp 11%      | 8911: CoSp 49%, ChaeSp 9%, PhEu 3%       |
| 123       | Negative                  | 6121: DiSp* 49%, PIOS 19%, SySp 19%      | 7519: DiLe* 25%, PIOS 14%, HoMa 14%      |
| 125       | Negative                  | 2753: SySp* 56%, ViVi 8%, SpRu 7%        | 2500: HoMa* 49%, CoSp 13%, MyTa 5%       |
| 127       | DoSe                      | 1801: LaCa 68%, SySp 25%, InSp 6%        | 1450: LaCa 67%, HoMa 21%, CoSp 2%        |
| 139       | Negative                  | 1248: ClHe* 22%, AuSp 12%, LaCa 8%       | 2005: MyTa* 20%, CoSp 18%, AuPu 11%      |
| 141       | Negative                  | 5545: DiSp* 21%, SySp** 21%, SpRu 16%    | 11966: HoMa** 17%, DiLe* 12%, CoSp 10%   |
| 142       | Negative                  | 2421: LoPi 40%, NeGe* 28%, DoPi 9%       | 1590: CoSp 43%, NeMi* 12%, MyEl 7%       |
| 148       | Negative                  | 4762: ClHe* 40%, HerSp** 35%, SpRu 15%   | 8556: HeJu** 37%, MyTa* 35%, SpCa 9%     |
| 154       | Negative                  | 5892: ViVi 18%, LoCo 13%, HeSp* 12%      | 13465: CoSp 31%, HeJu *12%, LoCo 10%     |
| 2404      | NA                        | 3777: DoPi* 100%                         | 5281: PaCa* 76%, CoSp 9%, PsOp 2%        |
| 3904      | NA                        | 598: LeAc* 52%, AlAl 23%, HaOr 23%       | 1413: LeGu* 44%, CoSp 24%, Allr 19%      |
| 3906      | NA                        | 282: DoPi* 68%, DoSe** 32%               | 907: MyEl** 70%, CoSp 7%, PaCa* 4%       |
| 4154      | DoPi, DoSe, LeAc          | 2741: LoPi 94%, AnCo* 3%, NeGe 1%        | 5281: CoSp 86%, AnFo* 3%, HoMa 1%        |
| 4162      | Negative                  | 3674: LoPi 62%, DoPi 9%, CeFe 6%         | 1951: CoSp 57%, CeFe 10%, MyEl 9%        |
| 4180      | DoSe                      | 602: DoPi* 32%, LoPi 22%, ClHe 18%       | 1027: MyEl* 27%, CoSp 26%, MyTa 21%      |
| 4181      | Negative                  | 2853: LoPi 63%, LoSp 6%, LoCo 5%         | 4582: CoSp 62%, LoSp 6%, LoCo 5%         |
| 4192      | DoSe                      | 5311: LoPi 32%, PhLa 18%, CyMi 13%       | 6552: CoSp 33%, AlCy 13%, CyNi 10%       |
| 4194      | LeAc                      | 4388: PeSp* 44%, NeGe 15%, RhiSp 11%     | 4001: TrSp* 40%, NeAb 8%, ScSp 7%        |
| 4195      | LeAc                      | 1935: SySp* 52%, LoPi 11%, PeSp 10%      | 4938: HoMa* 44%, CoSp 15%, TrSp 10%      |
| 4197      | DoSe                      | 4387: LoPi* 46%, DoPi** 25%, RhySp 8%    | 6031: CoSp 49%, MyEl** 19%, LoSp* 14%    |
| 4220      | Negative                  | 4349: LoPi 58%, AnSp 32%, PhLa 5%        | 11258: CoSp 56%, AnSp 28%, AlCy 3%       |
| 4221      | DoSe                      | 671: LoPi 47%, ClHe* 43%, AuSp 3%        | 2039: CoSp 47%, MyTa* 37%, MyEl 4%       |
| 4222      | DoSe                      | 5232: LoPi 48%, DoPi*7%, EuSp 6%         | 5333: CoSp 49%, MyEl* 7%, PhSp 5%        |
| 4223      | DoSe, LeAc                | 1029: SySp* 25%, DiSp 10%, DoPi 8%       | 1949: HoMa* 20%, CoSp 8%, MyEl 8%        |
| 5136      | Negative                  | 158: AsSy* 73%, DiVi 27%                 | 825: AsSy* 36%, CoSp 13%, CoSp 11%       |
| 5137      | Negative                  | 1149: HeAn* 56%, DoPi19%, DoSe 13%       | 674: HeAb* 45%, MyEl 31%, CoSp 3%        |
| 5146      | Negative                  | 5414: GiTr 17%, DiSp 17%, CeSp 14%       | 6450: CeSp 14%, AlCy 11%, GiTr 10%       |
| 5148      | Negative                  | 463: DiSp* 45%, ArSp 11%, GiTr 11%       | 259: DiLe* 29%, PeySp 10%, GiTr 7%       |

|       |                 |                                       |                                     |
|-------|-----------------|---------------------------------------|-------------------------------------|
| 5151  | Negative        | 3877: CyMi* 22%, ClHe 11%, ClSp 9%    | 2503: CyNi* 18%, CoSp 15%, MyTa 11% |
| 5186  | Negative        | 474: ClHe* 70%, ViVi 8%, DiSp 5%      | 268: MyTa*, 66%, CoSp 15%, AuPu 4%  |
| 5194  | Negative        | 925: DiVi* 26%, HelSp 20%, MaOb 11%   | 505: PeSp* 17%, MyTa 10%, DoSp 10%  |
| 5195  | Negative        | 320: RaHy* 57%, ZySp1 19%, ExSp 18%   | 130: RaSp* 41%, CaSp 12%, ZyVe 11%  |
| 5297  | Negative        | 4508: ZySp2* 18%, RhiSp 16%, RhoSp 5% | 3963: ZyVe* 17%, CoSp 10%, ScSp 10% |
| 5307  | Negative        | 1986: ZySp1* 20%, ExSp 12%, ClHe 10%  | 765: ZyVe* 13%, CoSp 11%, MyTa 10%  |
| 14374 | ND <sup>2</sup> | 1637: LeAc* 38%, DoSp 13%, TeSp 10%   | 1374: LeGu* 31%, PeIn 10%, CoSp 7%  |
| 14378 | ND              | 3561: SySp* 46%, NeSp 23%, ChSp 6%    | 2861: HoMa* 42%, PlSt 16%, CoSp 8%  |

<sup>1</sup>Abbreviations for species: AlAl, *Alternaria alternata*; AlCy, *Allantophomopsis cytisporae*; Allr, *Alternaria iridialustralis*; AnCo, *Anthostomella conorum*; AnFo, *Anthostomella formosa*; AnSp, *Anthostomella* sp.; ArSp, *Articulospora* sp.; AsSy, *Aspergillus sydowii*; AuPu, *Aureobasidium pullulans*; AuSp, *Aureobasidium* sp.; CaSp, Capnodiales sp.; CeFe, *Cenangium ferruginosum*; CeSp, Ceratobasidiaceae sp.; ChSp, *Chalara* sp.; ChaeSp, *Chaetothyriales* sp.; ClHe, *Cladosporium herbarum*; ClSp, *Cladosporium* sp.; CoSp, *Coniothyrium* sp.; CoTu, *Coleosporium tussilaginis*; CyMi, *Cyclaneusma minus*; CyNi, *Cyclaneusma niveum*; CySp, *Cyphellophora* sp.; DiLe, *Didymella lentis*; DiSp, Didymellaceae sp.; DiVi, *Didymella viburnicola*; DoPi, *Dothistroma pini*; DoSe, *Dothistroma septosporum*; DoSp, Dothideomycetes sp.; EuSp, Eurotiomycetes sp.; ExSp, *Extremus* sp.; GiTr, *Gibberella tricinca*; HaOr, *Hannaella oryzae*; HeAb, *Heterobasidion abietinum*; HeAn, *Heterobasidion annosum*; HeJu, *Herpotrichia juniperi*; HelSp, Helotiales sp.; HerSp, *Herpotrichia* sp.; HoMa, *Hormonema macrosporum*; InSp, Insecta sp.; LaCa, *Lachnellula calyciformis*; LeAc, *Lecanosticta acicola*; LeGu, *Lecanosticta guatemalensis*; LoCo, *Lophodermium conigenum*; LoPi, *Lophodermium pinastri*; LoSp, *Lophodermium* sp.; MaOb, *Malassezia obtusa*; MyEl, *Mycosphaerella ellipsoidea*; MyTa, *Mycosphaerella tassiana*; NeAb, *Neocatenulostroma abietis*; NeGe, *Neocatenulostroma germanicum*; NeMi, *Neocatenulostroma microsporum*; NeSp, *Nectria* sp.; PaCa, *Passalora californica*; PeIn, *Perusta inaequalis*; PeSp, *Pestalotiopsis* sp.; PeySp, *Peyronellaea* sp.; PhEu, *Phaeococcomyces eucalyptii*; PhLa, *Phacidium lacerum*; PhSp, *Phaeomoniella* sp.; PlOs, *Pleurophoma ossicola*; PlSt, *Pleonectria strobii*; RaHy, *Ramularia hydrangeae-macrophyllae*; RaSp, *Ramularia* sp.; RhiSp, *Rhizosphaera* sp.; RhoSp, *Rhodotorula* sp.; RhySp, *Rhytismataceae* sp.; ScSp, *Scleroconidioma sphagnicola*; SpCa, *Sporobolomyces carnicolor*; SpRu, *Sporobolomyces ruberrimus*; SySp, *Sydowia* sp.; ZySp1, *Zymoseptoria* sp.; ZySp2, *Zymoseptoria* sp.; ZyVe, *Zymoseptoria verkleyi*; TeSp, Teratosphaeriaceae sp.; TrSp, *Truncatella spadicea*; ViVi, *Vishniacozyma victoriae*;

<sup>2</sup>ND, not determined

**Table 3** Identification of Fungi in potato samples. Numbers and percentages in Sequel and MinION columns indicate the number of fungal reads and per cent of sequences assigned to particular OTUs. Asterisks indicate taxon names that correspond to each other based on >98% sequence similarity.

| Sample | Sanger <sup>1</sup> | Sequel                              | MinION                              |
|--------|---------------------|-------------------------------------|-------------------------------------|
| KL001  | failed              | 429: ClHe 10%, BuCr 8%, SpRo 7%     | 310: CoSp 24%, CerSp 16%, LeGu 11%  |
| KL002  | failed              | 282: KoCh 27%, PeEx 13%, SpRo 8%    | 271: MyEl 27%, KoCh 9%, CoSp 8%     |
| KL003  | failed              | 770: BuAl 21%, FiSp 14%, ClSp 12%   | 570: BuAl 17%, ClDe 12%, CoSp 11%   |
| KL004  | failed              | 209: EpNi 12%, ClHe 10%, SpRo 10%   | 444: NeAb 13%, CoSp 11%, NeMi 9%    |
| KL005  | FiWi                | 820: FiWi 41%, DioSp 5%, BuAu 5%    | 848: FiWi 26%, MyTa 13%, CoSp 10%   |
| KL006  | failed              | 433: SpRo 17%, LeSp 8%, ViVi 7%     | 275: CoSp 15%, HoMa 11%, MyTa 8%    |
| KL007  | failed              | 1226: FiSp* 26%, SpSp 11%, ClHe 7%  | 745: CoSp 15%, FiSt* 13%, SpSp 7%   |
| KL008  | failed              | 1948: PaLa* 49%, SpRo 9%, ClHe 6%   | 579: TreSp* 36%, CoSp 14%, MyTa 8%  |
| KL009  | failed              | 1753: DiSp* 15%, DiPo 12%, ClHe 11% | 735: PeySp* 12%, CoSp 11%, MyTa 8%  |
| KL010  | BoEx                | 868: BoSp* 47%, FiSp 12%, SpRo 5%   | 970: BoLy* 26%, CoSp 18%, FiSt 5%   |
| KL011  | BoEx                | 1131: BoSp* 71%, ExEq 9%, ClHe 4%   | 868: BoLy* 52%, ExEq 8%, MyTa 4%    |
| KL012  | BoEx                | 1421: BoSp* 96%, ViTe 2%, MySp 1%   | 1288: BoLy* 50%, CoSp 14%, HeJu 3%  |
| KL013  | DioSp               | 3148: ClHe* 17%, BuCr 9%, ViVi 8%   | 2599: CoSp 24%, MyTa* 13%, HyaSp 4% |
| KL014  | failed              | 2437: CyMa 14%, ViVi* 10%, LeSp 7%  | 2549: CoSp 30%, ViDi* 10%, CoTu 6%  |
| KL015  | BoEx                | 890: BoSp* 92%, BuCr 1%, FiSp 1%    | 1197: BoLy* 37%, LoCo 19%, CoSp 8%  |
| KL016  | failed              | 1110: ViVi 18%, PaLa* 15%, LeSp 12% | 1005: CoSp 29%, TreSp* 10%, HoMa 7% |
| KL017  | BoEx                | 1325: BoSp* 65%, FiSp 8%, ViVi 4%   | 519: BoLy* 44%, CoSp 15%, TrSp 7%   |
| KL018  | failed              | 426: ClHe* 35%, PlSp 13%, FiSp 13%  | 338: CoSp 39%, MyTa* 11%, MyEl 9%   |

|       |        |                                      |                                       |
|-------|--------|--------------------------------------|---------------------------------------|
| KL019 | failed | 1399: AuSp* 13%, BuCr 11%, ViTe 11%  | 596: CoSp 32%, AuPu* 13%, BoLy 7%     |
| KL020 | BoEx   | 531: BoSp* 49%, SpSp 9%, FiSp 9%     | 317: CoSp 29%, BoLy* 17%, SpSp 5%     |
| KL021 | failed | 657: ClHe* 35%, ViVi 15%, ClSp 10%   | 589: MyTa* 30%, CoSp 20%, AuPu 9%     |
| KL022 | ClSp   | 400: ClHe* 42%, BuCr 13%, AuSp 9%    | 970: RhMu 33%, MyTa* 23%, CoSp 11%    |
| KL023 | failed | 64: AuSp 42%, ClHe 33%, AlAl 8%      | 457: CoSp 46%, AnSp 24%, AuSp 7%      |
| KL024 | ClSp   | 111: ClHe* 51%, SpRo 9%, DiBu 6%     | 107: MyTa* 29%, CoSp 20%, MyEl 10%    |
| KL025 | failed | 821: ViVi 18%, DiSp* 18%, ClSp 13%   | 850: CoSp 30%, PeySp* 12%, ClDe 8%    |
| KL026 | ClSp   | 772: ClHe* 16%, SuGr 15%, BuCr 12%   | 479: CoSp 42%, MyTa* 11%, AtSp 5%     |
| KL027 | DioSp  | 1099: BuCr 65%, ViVi 9%, ClHe 7%     | 165: CoSp 75%, CeFe 4%, BlGr 3%       |
| KL028 | failed | 2740: DiSp* 97%, HaVe 3%, CuMo 0%    | 1473: PeySp* 35%, DiLe 22%, PhBu 6%   |
| KL029 | failed | 1245: DiSp* 54%, BoSp** 46%, PICu 0% | 465: BoLy** 28%, PeySp* 21%, DiLe 11% |
| KL030 | failed | 8: MoSp* 100%                        | 122: PICu* 17%, ZyVe 11%, ScSp 8%     |
| KL031 | failed | 1931: DiSp* 93%, PeBi 4%, BoSp 1%    | 420: PeySp* 37%, DiLe 13%, PlSp 6%    |
| KL032 | failed | 308: PICu 43%, PsSp 22%, CuMo 17%    | 364: PICu 23%, PlOr 11%, GeAs 10%     |
| KL033 | failed | 1422: DeSp 50%, MoSp* 38%, NeSp 11%  | 309: PICu* 41%, PlSp 36%, NeSp 8%     |
| KL034 | failed | 223: PenSp 80%, MoSp 8%, PICu 3%     | 364: CeSp 13%, AlCy 12%, GiTr 8%      |
| KL035 | failed | 1059: PeBi 41%, PenSp 38%, PeBr 10%  | 185: PeBi 42%, PeAe 23%, PenGl 11%    |

758

759

760

761

762

763

764

765

766

767

768

769

770

771

772

773

774

775

776

777

778

779

780

781

782

783

784

785

<sup>1</sup>Abbreviations for species: AlAl, *Alternaria alternata*; AlCy, *Allantophomopsis cytisporae*; AnSp, *Anthostomella* sp.; AtSp, Atheliaceae sp.; AuPu, *Aureobasidium pullulans*; AuSp, *Aureobasidium* sp.; BlGr, *Blumeria graminis*; BoEx, *Boeremia exigua*; BoLy, *Boeremia lycopersici*; BoSp, *Boeremia* sp.; BuAl, *Bullera alba*; BuAu, *Buckleyzyma aurantiaca*; BuCr, *Bullera crocea*; CeFe, *Cenangium ferruginosum*; CerSp, Cercozoa sp.; CeSp, Ceratobasidiaceae sp.; ClDe, *Cladosporium delicatulum*; ClHe, *Cladosporium herbarum*; ClSp, *Cladosporium* sp.; CoSp, *Coniothyrium* sp.; CoTu, *Coleosporium tussilaginis*; CuMo, *Cutaneotrichosporon moniliiforme*; CyMa, *Cystofilobasidium macerans*; DeSp, *Dendryphion* sp.; DiBu, *Dioszegia butyracea*; DiLe, *Didymella lentis*; DioSp, *Dioszegia* sp.; DiPo, *Didymella pomorum*; DiSp, Didymellaceae sp.; CeSp, *Celosporium* sp.; EpNi, *Epicoccum nigrum*; ExEq, *Exophiala equina*; ExPi, *Exobasidium pieridis-ovalifoliae*; FiSp, *Filobasidium* sp.; FiSt, *Filobasidium stepposum*; FiWi, *Filobasidium wieringae*; GeAs, *Geomyces asperulatus*; GiTr, *Gibberella trincta*; HaVe, *Harzia velata*; HeJu, *Herpotrichia juniperi*; HoMa, *Hormonema macrosporum*; HyaSp, Hyaloscyphaceae sp.; KoCh, *Kondoa changbaiensis*; LaCa, *Lachnellula calyciformis*; LeGu, *Lecanosticta guatemalensis*; LeSp, *Leucosporidium* sp.; LoCo, *Lophodermium conigenum*; MoSp, *Monographella* sp.; MyEl, *Mycosphaerella ellipsoidea*; MySp, *Mycosphaerellaceae* sp.; MyTa, *Mycosphaerella tassiana*; NeAb, *Neocatenulostroma abietis*; NeMi, *Neocatenulostroma microsporium*; NeSp, *Nectria* sp.; PaCa, *Passalora californica*; PaLa, *Papillotrema laurentii*; PeAe, *Penicillium aethiopicum*; PeBi, *Penicillium bialowiezense*; PeBr, *Penicillium brevicompactum*; PeEx, *Penicillium expansum*; PenSp, *Penicillium* sp.; PeySp, *Peyronellaea* sp.; PhBu, *Phoma bulgarica*; PhLa, *Phacidium lacerum*; PICu, *Plectosphaerella cucumerina*; PlOr, *Plectosphaerella oratosquillae*; PlSp, *Pleosporales* sp.; PsSp, *Pseudogymnoascus* sp.; RaHy, *Ramularia hydrangeae-macrophyllae*; RhiSp, *Rhizosphaera* sp.; RhMu, *Rhodotorula mucilaginosa*; ScSp, *Scleroconidioma sphagnicola*; SpRo, *Sporobolomyces roseus*; SpSp, *Sporobolomyces* sp.; SuGr, *Suillus granulatus*; ZyVe, *Zymoseptoria verkleyi*; TreSp, *Tremellales* sp.; TrSp, *Truncatella spadicea*; ViDi, *Vishniacozyma dimenna*; ViTe, *Vishniacozyma tephrensis*; ViVi, *Vishniacozyma victoriae*

**Table 4** Identification of Stramenopila in potato samples based on the ITS1Oo + ITS4ngsUni primers. Numbers and percentages in Sequel and MinION columns indicate the number of all reads and per cent of sequences assigned to particular OTUs. Asterisks indicate taxon names that correspond to each other based on >98% sequence similarity. Samples with no PCR product and no sequences are excluded. Notable, plant and fungal sequences contributed on average 10% to MinION data (probably index switch artefacts from the fungal data set; not shown).

| Sample | Sequel                                                            | MinION                                                              |
|--------|-------------------------------------------------------------------|---------------------------------------------------------------------|
| KL003  | 262: <i>Phytophthora andina</i> 90%, <i>Peronospora radii</i> 10% | 63: <i>Phytophthora infestans</i> 84%, <i>Peronospora radii</i> 11% |
| KL004  | 155: Xanthophyceae sp. 100%                                       | 92: Stramenopila sp. 86%                                            |
| KL005  | 73: <i>Peronospora agrestis</i> 73%, Xanthophyceae 27%            | 29: <i>Peronospora agrestis</i> 83%, Stramenopila sp. 17%           |

|       |                                                                     |                                                                   |
|-------|---------------------------------------------------------------------|-------------------------------------------------------------------|
| KL006 | 143: <i>Peronospora</i> sp. 85%, <i>Eustigmatos</i> sp 15%          | 77: <i>Peronospora</i> sp. 79%, Eustigmataceae sp 13%             |
| KL007 | 102: Chromulinaceae sp. 84%, <i>Hyaloperonospora parasitica</i> 16% | 43: Chromulinaceae sp. 66%, <i>Hyaloperonospora parasitica</i> 9% |
| KL008 | 13: <i>Peronospora violae</i> 100%                                  | 6: <i>Peronospora violae</i> 84%                                  |
| KL010 | 71: Chromulinaceae sp 100%                                          | 69: Chromulinaceae sp. 93%,                                       |
| KL013 | 23: <i>Hyaloperonospora parasitica</i> 100%                         | 7: <i>Hyaloperonospora parasitica</i> 100%                        |
| KL014 | 13: Xanthophyceae sp. 100%                                          | 2: Stramenopila sp. 50%                                           |
| KL021 | 43: <i>Peronospora variabilis</i> 100%                              | 19: -                                                             |
| KL022 | 27: <i>Peronospora variabilis</i> 100%                              | 0: -                                                              |
| KL024 | 124: <i>Peronospora variabilis</i> 100%                             | 0: -                                                              |

786

787

**Table 5** Details of needle samples.

| Sample ID | Collection locality    | Collection date | Host                                     | Substrate              | Disease symptoms          |
|-----------|------------------------|-----------------|------------------------------------------|------------------------|---------------------------|
| 115       | Tallinn Botanic Garden | 17.11.2011      | <i>Pinus sylvestris</i>                  | Needle                 | <i>Dothistroma</i> -like  |
| 117       | Tallinn Botanic Garden | 17.11.2011      | <i>P. sylvestris</i>                     | Needle                 | <i>Dothistroma</i> -like  |
| 118       | Pirita                 | 17.11.2011      | <i>P. mugo</i>                           | Needle                 | <i>Dothistroma</i> -like  |
| 119       | Tallinn Botanic Garden | 17.11.2011      | <i>P. sylvestris</i>                     | Needle                 | <i>Dothistroma</i> -like  |
| 123       | Tallinn Botanic Garden | 17.11.2011      | <i>P. uncinata</i>                       | Needle                 | <i>Dothistroma</i> -like  |
| 125       | Tallinn Botanic Garden | 17.11.2011      | <i>P. rigida</i>                         | Needle                 | <i>Dothistroma</i> -like  |
| 127       | Tallinn Botanic Garden | 17.11.2011      | <i>P. contorta</i>                       | Needle                 | <i>Dothistroma</i> -like  |
| 139       | Tallinn Botanic Garden | 15.08.2011      | <i>P. x rotundata</i>                    | Needle                 | <i>Dothistroma</i> -like  |
| 141       | Tallinn Botanic Garden | 15.08.2011      | <i>P. mugo</i>                           | Needle                 | <i>Dothistroma</i> -like  |
| 142       | Tallinn Botanic Garden | 15.08.2011      | <i>P. x rotundata</i>                    | Needle                 | <i>Dothistroma</i> -like  |
| 148       | Tallinn Botanic Garden | 15.09.2011      | <i>P. mugo</i> var. <i>pumilio</i>       | Needle                 | <i>Dothistroma</i> -like  |
| 154       | Tallinn Botanic Garden | 15.09.2011      | <i>P. rhaetica</i>                       | Needle                 | <i>Dothistroma</i> -like  |
| 2404      | Mykolaiv, The Ukraine  | 10.09.2013      | <i>P. nigra</i> subsp. <i>pallasiana</i> | Living culture: DoPi   | NA <sup>1</sup>           |
| 3904      | Kärevere               | 20.01.2015      | <i>P. mugo</i>                           | Living culture: LeAc   | NA                        |
| 3906      | Kärevere               | 20.01.2015      | <i>P. mugo</i>                           | Living culture: DoSe   | NA                        |
| 4154      | NA                     | 09.10.2014      | NA                                       | Mock: DoPi, DoSe, LeAc | NA                        |
| 4162      | Levala                 | 09.10.2014      | <i>P. sylvestris</i>                     | Needle                 | <i>Dothistroma</i> -like  |
| 4180      | Kolli                  | 13.10.2014      | <i>P. sylvestris</i>                     | Needle                 | <i>Dothistroma</i> -like  |
| 4181      | Mustumetsa             | 13.10.2014      | <i>P. sylvestris</i>                     | Needle                 | <i>Dothistroma</i> -like  |
| 4192      | Soohara                | 07.10.2014      | <i>P. sylvestris</i>                     | Needle                 | <i>Dothistroma</i> -like  |
| 4194      | Värskä                 | 07.10.2014      | <i>P. sylvestris</i>                     | Needle                 | <i>Dothistroma</i> -like  |
| 4195      | Vastse-Kuuste          | 07.10.2014      | <i>P. mugo</i>                           | Needle                 | <i>Dothistroma</i> -like  |
| 4197      | Partsi                 | 07.10.2014      | <i>P. sylvestris</i>                     | Needle                 | <i>Dothistroma</i> -like  |
| 4220      | Sääre                  | 15.10.2014      | <i>P. sylvestris</i>                     | Needle                 | <i>Dothistroma</i> -like  |
| 4221      | Unimäe                 | 15.10.2014      | <i>P. sylvestris</i>                     | Needle                 | <i>Dothistroma</i> -like  |
| 4222      | Tori                   | 16.10.2014      | <i>P. mugo</i>                           | Needle                 | <i>Dothistroma</i> -like  |
| 4223      | Tori                   | 16.10.2014      | <i>P. mugo</i>                           | Needle                 | <i>Dothistroma</i> -like  |
| 5136      | Imported: Netherlands  | 03.11.2015      | <i>P. mugo</i> var. <i>pumilio</i>       | Needle                 | Asymptomatic              |
| 5137      | Imported: Germany      | 17.12.2015      | <i>Picea omorika</i>                     | Needle                 | Asymptomatic              |
| 5146      | Imported: Netherlands  | 03.11.2015      | <i>P. mugo</i>                           | Needle                 | Asymptomatic              |
| 5148      | Imported: Netherlands  | 03.11.2015      | <i>P. mugo</i>                           | Needle                 | Asymptomatic              |
| 5151      | Imported: Netherlands  | 03.11.2015      | <i>P. sylvestris</i>                     | Needle                 | Asymptomatic              |
| 5186      | Imported: Netherlands  | 26.10.2015      | <i>P. peuce</i>                          | Needle                 | Asymptomatic              |
| 5194      | Imported: Netherlands  | 26.10.2015      | <i>P. koraiensis</i>                     | Needle                 | Asymptomatic              |
| 5195      | Imported: Netherlands  | 26.10.2015      | <i>P. mugo</i>                           | Needle                 | Asymptomatic              |
| 5297      | Imported: Germany      | 17.12.2015      | <i>Picea pungens</i>                     | Needle                 | Asymptomatic              |
| 5307      | Imported: Germany      | 17.12.2015      | <i>Picea omorika</i>                     | Needle                 | Asymptomatic              |
| 14374     | Agali                  | 16.02.2018      | <i>P. sylvestris</i>                     | Needle                 | <i>Lecanosticta</i> -like |
| 14378     | Agali                  | 16.02.2018      | <i>P. mugo</i>                           | Needle                 | <i>Lecanosticta</i> -like |

788

<sup>1</sup>NA, not applicable

789

790

**Table 6** Details of potato samples.

| Sample ID          | Collection locality | Collection date | Potato cultivar | Substrate | Disease symptoms         |
|--------------------|---------------------|-----------------|-----------------|-----------|--------------------------|
| KL001              | Õssu                | 02.08.2017      | Ants            | Leaf      | Dark circular lesions    |
| KL002              | Õssu                | 02.08.2017      | Ants            | Leaf      | Dark circular lesions    |
| KL003              | Õssu                | 02.08.2017      | Ants            | Leaf      | Dark circular lesions    |
| KL004              | Õssu                | 02.08.2017      | Ants            | Leaf      | Dark circular lesions    |
| KL005              | Õssu                | 02.08.2017      | Sarpo Mira      | Leaf      | Dark circular lesions    |
| KL006              | Õssu                | 02.08.2017      | Sarpo Mira      | Leaf      | Dark circular lesions    |
| KL007              | Õssu                | 02.08.2017      | Sarpo Mira      | Leaf      | Dark circular lesions    |
| KL008              | Õssu                | 02.08.2017      | Sarpo Mira      | Leaf      | Dark circular lesions    |
| KL009              | Õssu                | 02.08.2017      | Toluca          | Leaf      | Dark circular lesions    |
| KL010              | Õssu                | 02.08.2017      | <b>Toluca</b>   | Leaf      | Dark circular lesions    |
| KL011              | Õssu                | 02.08.2017      | <b>Toluca</b>   | Leaf      | Dark circular lesions    |
| KL012              | Õssu                | 02.08.2017      | <b>Toluca</b>   | Leaf      | Dark circular lesions    |
| KL013              | Õssu                | 02.08.2017      | Makhai          | Leaf      | Dark circular lesions    |
| KL014              | Õssu                | 02.08.2017      | Makhai          | Leaf      | Dark circular lesions    |
| KL015              | Õssu                | 02.08.2017      | Makhai          | Leaf      | Dark circular lesions    |
| KL016              | Õssu                | 02.08.2017      | Makhai          | Leaf      | Dark circular lesions    |
| KL017              | Õssu                | 02.08.2017      | Kelly           | Leaf      | Dark circular lesions    |
| KL018              | Õssu                | 02.08.2017      | Kelly           | Leaf      | Dark circular lesions    |
| KL019              | Õssu                | 02.08.2017      | Kelly           | Leaf      | Dark circular lesions    |
| KL020              | Õssu                | 02.08.2017      | Kelly           | Leaf      | Dark circular lesions    |
| KL021              | Karala              | 02.08.2017      | unknown         | Leaf      | Dark circular lesions    |
| KL022              | Karala              | 02.08.2017      | unknown         | Leaf      | Dark circular lesions    |
| KL023              | Karala              | 02.08.2017      | unknown         | Leaf      | Dark circular lesions    |
| KL024              | Karala              | 02.08.2017      | unknown         | Leaf      | Dark circular lesions    |
| KL025              | Metsaküla           | 12.08.2017      | unknown         | Leaf      | Dark circular lesions    |
| KL026              | Metsaküla           | 12.08.2017      | unknown         | Leaf      | Dark circular lesions    |
| KL027              | Metsaküla           | 12.08.2017      | unknown         | Leaf      | Dark circular lesions    |
| KL028              | Väljataguse         | 11.04.2018      | Elfe            | Tuber     | Potato gangrene          |
| KL029              | Väljataguse         | 11.04.2018      | Elfe            | Tuber     | Potato gangrene          |
| KL030              | Väljataguse         | 11.04.2018      | Elfe            | Tuber     | Potato gangrene          |
| KL031              | Õssu                | 11.04.2018      | Laura           | Tuber     | Potato gangrene          |
| KL032              | Suur-Rahula         | 11.04.2018      | Gala            | Tuber     | Potato gangrene          |
| KL033              | Tagaküla            | 11.04.2018      | Laura           | Tuber     | Potato gangrene          |
| KL034              | Tagaküla            | 11.04.2018      | Laura           | Tuber     | Potato gangrene          |
| KL035              | Padise              | 11.04.2018      | Marabel         | Tuber     | Potato gangrene          |
| KL036 <sup>1</sup> | Õssu                | 30.08.2018      | Carolus         | Tuber     | <i>Rhizoctonia</i> -like |
| KL037 <sup>2</sup> | Õssu                | 30.08.2018      | Carolus         | Tuber     | <i>Rhizoctonia</i> -like |

<sup>1</sup>used only for the ONT2g and ONT2h runs;

<sup>2</sup>used only for the ONT2i run
